# Supplementary material for: Mobile genetic elements in the genome of the beneficial rhizobacterium Pseudomonas fluorescens Pf-5
Source: PubMed Central journal article supplement (PMC2647930; doi:10.1186/1471-2180-9-8), 2009-01-13
Supplement: 1471-2180-9-8-S1.pdf [file 1471-2180-9-8-S1.pdf]

**Additional file 1 – Sequence analysis of prophage 01 of *P. fluorescens* Pf-5 genome**

| CDS      | Gene name   | Position         | Protein length (residues) | Protein MW (kDa) | Putative ribosome binding site | Closest protein of phage or plasmid origin (accession no.), blastp E-value <sup>a</sup>     | Overall closest protein (accession no.), blastp E-value <sup>a</sup>                                | Predicted function (functional domains)                               |
|----------|-------------|------------------|---------------------------|------------------|--------------------------------|---------------------------------------------------------------------------------------------|-----------------------------------------------------------------------------------------------------|-----------------------------------------------------------------------|
| PFL_1210 | <i>priR</i> | 1386136..1386882 | 266                       | 30.036           | GTGTT                          | Pyocin repressor PrtR from <i>Pseudomonas aeruginosa</i> (Q06553), 5e-35                    | Hypothetical protein Pfl01_1135 from <i>Pseudomonas fluorescens</i> Pf0-1 (ABA72878); 2e-129        | Prophage repressor, Cro/CI family; HTH domain (COGs 1396, 2932, 4800) |
| PFL_1211 | <i>hol</i>  | 1387400..1387750 | 116                       | 12.379           | GGAG                           | R2/F2 pyocin-specific holin from <i>Pseudomonas aeruginosa</i> (BAA83151), 2e-17            | Hypothetical protein Pfl01_1137 from <i>Pseudomonas fluorescens</i> Pf0-1 (ABA72880); 7e-50         | Holin                                                                 |
| PFL_1212 | PFL_1212    | 1387843..1388166 | 107                       | 11.664           | GCAGG                          | PRF23 from R2/F2 pyocin region from <i>Pseudomonas aeruginosa</i> (BAA83167), 8e-18         | Putative protein D (AAO56868), <i>P. syringae</i> pv. <i>tomato</i> DC3000, 1e-25                   | Tail protein D                                                        |
| PFL_1213 | PFL_1213    | 1388216..1389352 | 378                       | 40.966           | AGGAG                          | None detected                                                                               | Hypothetical protein YvbX from <i>Bacillus subtilis</i> (NP_391282), 2e-40                          | Putative peptidoglycan hydrolase (COGs 3325, 3858)                    |
| PFL_1214 | PFL_1214    | 1389510..1390091 | 193                       | 20.897           | AGGAG                          | Hypothetical protein Sb11 from <i>Salmonella typhimurium</i> phage ST64B (NP_700384), 1e-19 | Hypothetical protein Psyr4420 from <i>P. syringae</i> pv. <i>tomato</i> DC3000 (ZP_00128092), 9e-47 | Hypothetical phage protein                                            |
| PFL_1215 | PFL_1215    | 1390088..1390270 | 60                        | 6.345            | GGAGA                          | Hypothetical protein Orf10 from <i>Shigella flexneri</i> phage V (AAL89419), 1e-06          | Hypothetical protein Pfl01_1153 from <i>Pseudomonas fluorescens</i> Pf0-1 (ABA72896); 2e-17         | Hypothetical phage protein                                            |
| PFL_1216 | PFL_1216    | 1390270..1391766 | 498                       | 52.810           | AGGAG                          | Tail sheath protein Sb13 from <i>Salmonella typhimurium</i> phage ST64B                     | Hypothetical protein Pfl01_1154 from <i>Pseudomonas</i>                                             | Tail sheath protein (COG4386)                                         |

|          |          |                  |     |        |       |                                                                                                                 |                                                                                                                                       |                                        |
|----------|----------|------------------|-----|--------|-------|-----------------------------------------------------------------------------------------------------------------|---------------------------------------------------------------------------------------------------------------------------------------|----------------------------------------|
| PFL_1217 | PFL_1217 | 1391833..1392180 | 115 | 12.360 | GGAG  | (NP_700386), 1e-131<br>Tail tube protein Sb14 from <i>Salmonella typhimurium</i> phage ST64B (NP_700387), 3e-16 | <i>fluorescens</i> Pf0-1 (ABA72897);0.0<br>Hypothetical protein Pfl01_1155 from <i>Pseudomonas fluorescens</i> Pf0-1 (ABA72898);1e-54 | Tail tube protein                      |
| PFL_1218 | PFL_1218 | 1392177..1392473 | 98  | 10.538 | GAAGG | Hypothetical protein Orf13 from <i>Shigella flexneri</i> phage V (NP_599045), 3e-11                             | Hypothetical protein Pfl01_1156 from <i>Pseudomonas fluorescens</i> Pf0-1 (ABA72899);1e-45                                            | Hypothetical protein                   |
| PFL_1219 | PFL_1219 | 1392604..1394202 | 532 | 55.965 | AGGTG | Tail protein Orf14 from <i>Shigella flexneri</i> phage V (NP_599046), 3e-16                                     | Hypothetical protein Pfl01_1157 from <i>Pseudomonas fluorescens</i> Pf0-1 (ABA72900);0.0                                              | Tail tape measure protein (COG5412)    |
| PFL_1220 | PFL_1220 | 1394192..1395436 | 414 | 45.777 | GGAGG | Tail/DNA circulation protein Orf15 from <i>Shigella flexneri</i> phage V (NP_599047), 5e-36                     | Hypothetical protein Pfl01_1158 from <i>Pseudomonas fluorescens</i> Pf0-1 (ABA72901);1e-157                                           | Tail/DNA circulation protein (COG4228) |
| PFL_1221 | PFL_1221 | 1395440..1396480 | 346 | 37.632 | GGAG  | Tail protein Orf15 from <i>Shigella flexneri</i> phage V (NP_599048), 2e-55                                     | Hypothetical protein Pfl01_1159 from <i>Pseudomonas fluorescens</i> Pf0-1 (ABA72902);8e-146                                           | Tail protein P (COG4379)               |
| PFL_1222 | PFL_1222 | 1396590..1397096 | 168 | 17.601 | AAGGA | Tail protein Orf17 from <i>Shigella flexneri</i> phage V (NP_599049), 1e-18                                     | Hypothetical protein Pfl01_1160 from <i>Pseudomonas fluorescens</i> Pf0-1 (ABA72903);1e-76                                            | Baseplate assembly protein (COG4384)   |
| PFL_1223 | PFL_1223 | 1397099..1397497 | 132 | 15.415 | GGAGG | Tail protein Orf18 from <i>Shigella flexneri</i> phage V (NP_599050), 9e-15                                     | Hypothetical protein Pfl01_1161 from <i>Pseudomonas fluorescens</i> Pf0-1 (ABA72904);8e-49                                            | Tail protein (COG4381)                 |

|                |              |                  |     |        |       |                                                                                            |                                                                                                           |                                      |
|----------------|--------------|------------------|-----|--------|-------|--------------------------------------------------------------------------------------------|-----------------------------------------------------------------------------------------------------------|--------------------------------------|
| PFL_1224       | PFL_1224     | 1397487..1398527 | 346 | 36.968 | AGGTG | Tail protein Orf19 from <i>Shigella flexneri</i> phage V (NP_599051), 7e-58                | Hypothetical protein Pfl01_1162 from <i>Pseudomonas fluorescens</i> Pf0-1 (ABA72905);4e-152               | Tail protein (COG3299)               |
| PFL_1225       | PFL_1225     | 1398515..1399114 | 199 | 22.390 | GGAGG | Tail protein Orf20 from <i>Shigella flexneri</i> phage V (NP_599052), 4e-08                | Hypothetical protein Pfl01_1163 from <i>Pseudomonas fluorescens</i> Pf0-1 (ABA72906);7e-87                | Tail protein (COG3778)               |
| PFL_1226       | PFL_1226     | 1399130..1400239 | 369 | 38.720 | GAGG  | Side tail fibre protein StfE from <i>E.coli</i> lambdoid prophage e14 (P33227), 6e-16      | Hypothetical protein PSEEN4159 from <i>Pseudomonas entomophila</i> L48 (YP_609632);1e-57                  | Tail fibre protein (COG5301)         |
| 1 <sup>b</sup> | <i>orf1</i>  | 1400236..1400613 | 125 | 14.609 | GGAG  | Hypothetical protein Orf21 from <i>Pseudomonas aeruginosa</i> phage φCTX (BAA36248), 4e-11 | Hypothetical protein Pfl01_1169 from <i>Pseudomonas fluorescens</i> Pf0-1 (ABA72912);7e-87                | Hypothetical phage protein           |
| PFL_1227       | <i>lys</i>   | 1400664..1401227 | 187 | 20.881 | AAACA | R2/F2 pyocin-specific lysozyme from <i>Pseudomonas aeruginosa</i> (BAA83168), 2e-49        | Hypothetical protein Pfl01_1172 from <i>Pseudomonas fluorescens</i> Pf0-1 (ABA72915);1e-89                | Endolysin (COG3179)                  |
| PFL_1228       | PFL_1228     | 1401335..1401850 | 171 | 18.042 | AGGAG | Hypothetical protein RPRSA1_gp15 from <i>Ralstonia</i> phage phiRSA1 (YP_001165264), 6e-21 | Conserved hypothetical protein Bcenmc03_0198 from <i>Burkholderia cenocepacia</i> MC0-3 (ACA89378);1e-28  | Conserved hypothetical phage protein |
| 2 <sup>b</sup> | <i>orf2</i>  | 1401912..1402109 | 65  | 7.246  | GGATA | Translational regulator Com from <i>Pseudomonas</i> phage B3 (AAQ13965), 2e-08             | Conserved hypothetical protein PA14_14540 from <i>Pseudomonas aeruginosa</i> UCBPP-PA14 (ABJ13088), 2e-16 | Com-like phage protein (COG4416)     |
| PFL_1229       | <i>llpA1</i> | 1402010..1402960 | 280 | 31.032 | AGGTA | None detected                                                                              | Bacteriocin putidacin L1                                                                                  | Lectin-like                          |

(AAM95702),  
*Pseudomonas* sp.  
BW11M1, 9e-61

bacteriocin  
putidacin

---

<sup>a</sup> Only expectation values of  $1e^{-05}$  and below were considered as significant matches during BLAST database searches; <sup>b</sup> open reading frames not present in the original genome annotation.
