# Supplementary material for: Mobile genetic elements in the genome of the beneficial rhizobacterium Pseudomonas fluorescens Pf-5
Source: PubMed Central journal article supplement (PMC2647930; doi:10.1186/1471-2180-9-8), 2009-01-13
Supplement: 1471-2180-9-8-S2.pdf [file 1471-2180-9-8-S2.pdf]

**Additional file 2 – Sequence analysis of prophage 01 of *P. fluorescens* Q8r1-96**

| CDS | Gene name   | Position    | Protein length (residues) | Protein MW (kDa) | Putative ribosome binding site | Closest protein of phage or pyocin origin (accession no.), blastp E-value <sup>a</sup>   | Overall closest protein (accession no.), blastp E-value <sup>a</sup>                                  | Predicted function (functional domains)                               |
|-----|-------------|-------------|---------------------------|------------------|--------------------------------|------------------------------------------------------------------------------------------|-------------------------------------------------------------------------------------------------------|-----------------------------------------------------------------------|
| 1   | <i>orf1</i> | 52..405 (-) | 117                       | 12.794           | AAGGA                          | Hypothetical protein from <i>Pseudomonas</i> sp. MIS38 (BAF40425); 7e-22                 | Hypothetical protein from Pfl01_1963 from <i>P. fluorescens</i> Pf0-1 (ABA73706); 2e-20               | Conserved hypothetical protein                                        |
| 2   | <i>prtR</i> | 906..1709   | 267                       | 30.178           | CATTG                          | Negative regulator PrtR of pyocin genes from <i>P. aeruginosa</i> PAO1 (BAA02198); 5e-41 | Possible phage repressor of Cro/CI family from <i>P. fluorescens</i> Pf0-1 (ABA72878); 1e-136         | Prophage repressor, Cro/CI family; HTH domain (COGs 2932, 4800, 4800) |
| 3   | <i>orf3</i> | 2025..2333  | 102                       | 11.342           | GAGG                           | Com translational regulator from <i>Pseudomonas</i> phage B3 (AAQ13965); 2e-06           | Hypothetical protein Psyr_4601 from <i>P. syringae</i> pv. <i>syringae</i> B728a, , (AAY39631); 1e-12 | Mu-like prophage translational regulator Com (COG4416)                |
| 4   | <i>orf4</i> | 2354..2998  | 214                       | 22.795           | GAGG                           | None detected                                                                            | Hypothetical protein Ava_C0051 from <i>Anabaena variabilis</i> ATCC29413 (ABA25140); 2e-14            | Conserved hypothetical protein                                        |
| 5   | <i>hol</i>  | 3046..3396  | 116                       | 12.447           | GGAAG                          | Holin from pyocin region from <i>P. aeruginosa</i> PAO1 (BAA83136); 9e-27                | Putative holin PFL_1211 (AAY90498) from <i>P. fluorescens</i> Pf-5; 1e-51                             | Holin                                                                 |
| 6   | <i>cma</i>  | 3621..4436  | 271                       | 29.433           | AGGAA                          | None detected                                                                            | Hypothetical protein EXA13 from <i>P. aeruginosa</i> 6077 (ABD94622); 6e-24                           | Putative bacteriocin with similarity to colicin M                     |
| 7   | <i>orf7</i> | 4553..4990  | 145                       | 15.572           | AGGA                           | None detected                                                                            | None detected                                                                                         | Hypothetical protein                                                  |
| 8   | <i>orf8</i> | 5859..6056  | 65                        | 7.313            | GAGG                           | None detected                                                                            | None detected                                                                                         | Hypothetical                                                          |

|    |              |              |     |        |         |                                                                                             |                                                                                                        |                                               |
|----|--------------|--------------|-----|--------|---------|---------------------------------------------------------------------------------------------|--------------------------------------------------------------------------------------------------------|-----------------------------------------------|
| 9  | <i>orf9</i>  | 6285..6869   | 194 | 21.236 | GGAG    | Hypothetical protein Sb11 from <i>Salmonella typhimurium</i> phage ST64B (AAL25890), 4e-21  | Hypothetical protein Pfl01_1152 from <i>P. fluorescens</i> Pf0-1 (ABA72895); 7e-83                     | protein<br>Hypothetical bacteriophage protein |
| 10 | <i>orf10</i> | 6866..7048   | 60  | 6.488  | GGAG    | Hypothetical protein Orf10 from <i>Shigella flexneri</i> phage V (AAL89419), 1e-05          | Hypothetical protein PFL_1215 (AAY90502) from <i>P. fluorescens</i> Pf-5; 2e-21                        | Hypothetical bacteriophage protein            |
| 11 | <i>orf11</i> | 7048..8544   | 498 | 52.980 | GGAG    | Tail sheath protein Sb13 from <i>Salmonella typhimurium</i> phage ST64B (AAL25892), 1e-151  | Mu-like prophage tail sheath protein gpL (Pfl01_1154) from <i>P. fluorescens</i> Pf0-1 (ABA72897); 0.0 | Tail sheath protein (COG4386)                 |
| 12 | <i>orf12</i> | 8611..8958   | 115 | 12.411 | GAAGG   | Tail tube protein gpM Sb14 from <i>Salmonella typhimurium</i> phage ST64B (AAL25893), 2e-16 | Hypothetical protein Pfl01_1155 from <i>P. fluorescens</i> Pf0-1 (ABA72898); 1e-57                     | Tail tube protein gpM                         |
| 13 | <i>orf13</i> | 8955..9251   | 98  | 10.474 | AAGGGGA | Hypothetical protein Orf13 from <i>Shigella flexneri</i> phage V (AAL89422), 2e-11          | Hypothetical protein Pfl01_1157 from <i>P. fluorescens</i> Pf0-1 (ABA72900); 1e-44                     | Small phage tail protein E                    |
| 14 | <i>orf14</i> | 9382..10956  | 524 | 54.549 | GGTG    | Tail protein Orf14 from <i>Shigella flexneri</i> phage V (AAL89423), 2e-16                  | Hypothetical protein Pfl01_1157 from <i>P. fluorescens</i> Pf0-1 (ABA72900); 2e-145                    | Phage tail tape measure protein (COG5412)     |
| 15 | <i>orf15</i> | 10943..12181 | 412 | 45.153 | GGAGG   | Tail DNA circulation protein Orf15 from <i>Shigella flexneri</i> phage V (AAL89424), 5e-37  | Mu-like prophage DNA circulation protein PFL_1220 from <i>P. fluorescens</i> Pf-5 (AAY90507); 2e-180   | Phage DNA circulation protein (COG4228)       |
| 16 | <i>orf16</i> | 12185..13225 | 346 | 37.735 | GGAG    | Tail protein P Orf16 from <i>Shigella flexneri</i> phage V (AAL89425), 6e-57                | Mu-like prophage tail protein gpP (Pfl01_1159) from <i>P. fluorescens</i> Pf0-1 (ABA72902); 6e-163     | Phage tail protein gpP (COG4379)              |
| 17 | <i>orf17</i> | 13490..13999 | 169 | 17.780 | AAGGA   | Putative baseplate assembly                                                                 | Mu-like prophage                                                                                       | Baseplate                                     |

|    |              |              |     |        |        |                                                                                                     |                                                                                                    |                                              |
|----|--------------|--------------|-----|--------|--------|-----------------------------------------------------------------------------------------------------|----------------------------------------------------------------------------------------------------|----------------------------------------------|
|    |              |              |     |        |        | protein Gp45 from <i>E. coli</i> phage P27 (CAC83568), 2e-20                                        | protein gp45 (Pfl01_1160) from <i>P. fluorescens</i> Pf0-1 (ABA72903); 1e-82                       | assembly protein Gp45 (COG4384)              |
| 18 | <i>orf18</i> | 13999..14397 | 132 | 15.308 | GGAGG  | Phage protein gp46 from <i>Shigella flexneri</i> bacteriophage V (AAL89427), 9e-20                  | Mu-like prophage protein gp46 (Pfl01_1161) from <i>P. fluorescens</i> Pf0-1 (ABA72904); 1e-57      | Phage protein gp46 (pfam07409)               |
| 19 | <i>orf19</i> | 14387..15427 | 346 | 36.701 | GGTG   | Tail protein gp47 from <i>Shigella flexneri</i> phage V (AAL89428), 2e-57                           | Phage FluMu protein gp47 (PFL_1224) from <i>P. fluorescens</i> Pf-5 (AAAY90511); 3e-165            | Tail protein gp47 (COG3299)                  |
| 20 | <i>orf20</i> | 15415..16014 | 199 | 22.181 | GGAGG  | Protein of unknown function Sb23 from <i>Salmonella typhimurium</i> phage ST64B (AAL25901), 1e-08   | Putative phage tail protein Pfl01_1163 from <i>P. fluorescens</i> Pf0-1 (ABA72906); 6e-96          | Hypothetical bacteriophage protein (COG3778) |
| 21 | <i>orf21</i> | 16026..17180 | 384 | 40.305 | GGAG   | None detected                                                                                       | Hypothetical protein Pfl01_1164 from <i>P. fluorescens</i> Pf0-1 (ABA72907); 1e-155                | Putative tail fiber protein                  |
| 22 | <i>orf22</i> | 17177..17686 | 169 | 18.503 | GGAG   | Tail fiber assembly protein gp25 from <i>Ralstonia</i> phage phiRSA1 (BAF52402), 1e-21              | Putative tail fiber assembly protein Pfl01_1165 from <i>P. fluorescens</i> Pf0-1 (ABA72908); 4e-46 | Putative tail fiber protein                  |
| 23 | <i>orf23</i> | 17714..18808 | 364 | 38.787 | GAGAGA | Protein gp32 from <i>Burkholderia</i> phage phiE202 (AB060734), 1e-13                               | Hypothetical protein Pfl01_1166 from <i>P. fluorescens</i> Pf0-1 (ABA72909); 2e-157                | Phage tail collar protein                    |
| 24 | <i>orf24</i> | 18816..19376 | 186 | 20.974 | GAGG   | Putative tail fiber assembly protein from <i>E. coli</i> O157:H7 prophage CP-933X (AAG56009), 5e-10 | Hypothetical protein Pfl01_1167 from <i>P. fluorescens</i> Pf0-1 (ABA72910); 5e-69                 | Conserved hypothetical protein               |
| 25 | <i>orf25</i> | 19539..20399 | 286 | 29.675 | GCAGG  | Putative tail fiber protein of <i>Burkholderia</i> phage Bups phi1 (ABY40547), 1e-07                | Putative tail fiber assembly protein Pfl01_1168 from <i>P.</i>                                     | Putative tail fiber assembly protein         |

|             |              |              |     |        |       |                                                                                |                                                                                                                                  |                                                 |
|-------------|--------------|--------------|-----|--------|-------|--------------------------------------------------------------------------------|----------------------------------------------------------------------------------------------------------------------------------|-------------------------------------------------|
| 26          | <i>orf26</i> | 20413..20844 | 143 | 16.383 | GGAGG | Hypothetical p23 protein of <i>Pseudomonas</i> phage phiCTX (BAA36258), 2e-21  | <i>fluorescens</i> Pf0-1 (ABA72911); 7e-41<br>Hypothetical protein Pfl01_1169 from <i>P. fluorescens</i> Pf0-1 (ABA72912); 1e-21 | Conserved hypothetical phage protein            |
| 27          | <i>lys</i>   | 20869..21432 | 187 | 20.950 | GATG  | Lytic enzyme (BAA83168) from pyocin region of <i>P. aeruginosa</i> PAO1, 9e-36 | Putative lytic enzyme Pfl01_1171 from <i>P. fluorescens</i> Pf0-1 (ABA72915); 7e-85                                              | Endolysin (COG3179)                             |
| 28          | <i>orf28</i> | 21414..21950 | 178 | 19.308 | GGTG  | None detected                                                                  | Putative phage protein PFL_3742 from <i>P. fluorescens</i> Pf-5 (AAY93007); 2e-52                                                | Conserved hypothetical protein                  |
| <i>cinA</i> | <i>cinA</i>  | 22022..22522 | 166 | 17.570 | GGAG  | None detected                                                                  | CinA-like protein Pfl01_1174 from <i>P. fluorescens</i> Pf0-1 (ABA72917); 7e-77                                                  | Competence damage-inducible protein A (COG1546) |
| <i>recA</i> | <i>recA</i>  | 22606..22689 | na  | na     | GAGGA | None detected                                                                  | Recombinase A protein from <i>P. fluorescens</i> Pf0-1 (ABA72918); 3e-18                                                         | Recombinase A                                   |

<sup>a</sup> Only expectation values of  $1e^{-05}$  and below were considered as significant matches during BLAST database searches.
