# Supplementary material for: Mobile genetic elements in the genome of the beneficial rhizobacterium Pseudomonas fluorescens Pf-5
Source: PubMed Central journal article supplement (PMC2647930; doi:10.1186/1471-2180-9-8), 2009-01-13
Supplement: 1471-2180-9-8-S3.pdf [file 1471-2180-9-8-S3.pdf]

### Additional file 3 – Sequence analysis of prophage 03 of *P. fluorescens* Pf-5

| CDS            | Gene name   | Position             | Protein length (residues) | Protein mol weight (kDa) | Putative ribosome binding site | Closest protein of phage or plasmid origin (accession no.), blastp E-value <sup>a</sup>              | Other similar proteins (accession no.), blastP E-value <sup>a</sup>                                   | Predicted function (functional domains)   |
|----------------|-------------|----------------------|---------------------------|--------------------------|--------------------------------|------------------------------------------------------------------------------------------------------|-------------------------------------------------------------------------------------------------------|-------------------------------------------|
| PFL_1976       | <i>int2</i> | 2207060..2208202     | 380                       | 43.927                   | GTAG                           | Shufflon-specific recombinase from plasmid ColIb-P9 (AAZ05392), 4e-21                                | Phage integrase family protein PputGB1_1711 from <i>Pseudomonas putida</i> GB-1 (YP_001667950), 0.0   | Putative phage integrase                  |
| 1 <sup>b</sup> | <i>orf1</i> | 2208171..2208452 (-) | 93                        | 10.325                   | GGAG                           | Transcriptional regulator PrtN from <i>Pseudomonas aeruginosa</i> pyocin (Q06552); 5e <sup>-05</sup> | Conserved hypothetical protein PputGB1_1711 from <i>Pseudomonas putida</i> GB-1 (ABY97615), 3e-36     | Putative phage-related positive regulator |
| PFL_1977       | PFL_1977    | 2208449..2208922 (-) | 157                       | 16.913                   | GGAG                           | None detected                                                                                        | None detected                                                                                         | Hypothetical protein                      |
| 2 <sup>b</sup> | <i>orf2</i> | 2209446..2211179 (-) | 176                       | 19.300                   | AGGAG                          | Hypothetical protein gp37 from <i>Burkholderia phage</i> BcepC6B (AAT38396); 1e-15                   | Hypothetical protein PA2G_00782 from <i>Pseudomonas aeruginosa</i> 2192 (EAZ57582); 2e <sup>-13</sup> | Conserved hypothetical phage protein      |
| PFL_1978       | PFL_1978    | 2209446..2211179 (-) | 577                       | 63.298                   | GGAG                           | Hypothetical protein gp41 from <i>Pseudomonas aeruginosa</i> phage CTX (NP_490641); 0.0              | Hypothetical protein Orf27 from <i>Pseudomonas putida</i> plasmid pWWO (NP_542819); 0.0               | Conserved hypothetical protein (COG0270)  |
| PFL_1979       | PFL_1979    | 2211169..2211507 (-) | 112                       | 12.047                   | AGGAG                          | None detected                                                                                        | Hypothetical protein PP3030 from <i>Pseudomonas putida</i> KT2440 (NP_745174); 4e <sup>-10</sup>      | Conserved hypothetical protein            |
| PFL_1980       | PFL_1980    | 2211507..2211728 (-) | 73                        | 8.368                    | AGGAG                          | None detected                                                                                        | None detected                                                                                         | Hypothetical protein                      |

|                |             |                      |     |        |               |                                                                                               |                                                                                                                                   |                                                                        |
|----------------|-------------|----------------------|-----|--------|---------------|-----------------------------------------------------------------------------------------------|-----------------------------------------------------------------------------------------------------------------------------------|------------------------------------------------------------------------|
| PFL_1981       | PFL_1981    | 2211725..2212144 (-) | 139 | 15.210 | GGAG          | None detected                                                                                 | Hypothetical protein PSPTO3426 from <i>Pseudomonas syringae</i> pv. <i>tomato</i> DC3000 (NP_793209), $6e^{-24}$                  | Conserved hypothetical protein                                         |
| PFL_1982       | <i>prtN</i> | 2212189..2212515 (-) | 108 | 12.260 | GCAAG         | Transcriptional regulator PrtN from <i>Pseudomonas aeruginosa</i> pyocin (Q06552); $5e^{-05}$ | Putative transcriptional regulator PSPTO3425 from <i>Pseudomonas syringae</i> pv. <i>tomato</i> DC3000 (NP_793208), $3e^{-40}$    | Putative phage-related positive regulator                              |
| PFL_1983       | PFL_1983    | 2212674..2212958 (-) | 94  | 10.986 | GGAG          | None detected                                                                                 | Putative DNA-binding Roi-like protein PSPTO3423 from <i>Pseudomonas syringae</i> pv. <i>tomato</i> DC3000 (NP_793206); $1e^{-33}$ | Conserved hypothetical phage protein                                   |
| PFL_1984       | PFL_1984    | 2212968..2213552 (-) | 194 | 21.429 | GGAG          | None detected                                                                                 | Hypothetical protein PSPTO3422 from <i>Pseudomonas syringae</i> pv. <i>tomato</i> DC3000 (NP_793205), $6e^{-49}$                  | Conserved hypothetical protein                                         |
| PFL_1985       | PFL_1985    | 2213627..2213758     | 43  | 4.439  | TAAG          | None detected                                                                                 | None detected                                                                                                                     | Hypothetical protein                                                   |
| PFL_1986       | PFL_1986    | 2213809..2214522 (-) | 237 | 26.143 | None selected | Repressor C2 from <i>Salmonella typhimurium</i> bacteriophage ST64T (NP_720299); $5e^{-21}$   | Repressor protein C1/C2 family PP3033 from <i>Pseudomonas putida</i> KT2440 (AAN68641); $2e^{-64}$                                | Putative LexA-like transcriptional repressor of C1/C2 family (COG1974) |
| 3 <sup>b</sup> | <i>orf3</i> | 2214599..2214871     | 90  | 9.740  | GAGG          | None detected                                                                                 | Putative regulatory protein PP3034 from                                                                                           | Conserved hypothetical                                                 |

|                       |            |                      |     |        |       |                                                                                                |                                                                                                                                   |                                                                       |                      |
|-----------------------|------------|----------------------|-----|--------|-------|------------------------------------------------------------------------------------------------|-----------------------------------------------------------------------------------------------------------------------------------|-----------------------------------------------------------------------|----------------------|
|                       |            |                      |     |        |       |                                                                                                |                                                                                                                                   | <i>Pseudomonas putida</i><br>KT2440<br>(NP_745178); 4e <sup>-29</sup> | protein              |
| PFL_1987              | PFL_1987   | 2215205..2215369 (-) | 54  | 5.197  | GGGA  | None detected                                                                                  | None detected                                                                                                                     | None detected                                                         | Hypothetical protein |
| PFL_1988 <sup>c</sup> | PFL_1988   | 2215220..2215738     | 172 | 18.872 | AGGA  | Hypothetical protein gp14 from <i>Burkholderia</i> phage Bcep176 (ABA60015), 5e <sup>-07</sup> | Hypothetical protein PSPTO3420 from <i>Pseudomonas syringae</i> pv. <i>tomato</i> DC3000 (NP_793203), 2e <sup>-85</sup>           | Conserved hypothetical phage protein                                  |                      |
| PFL_1989              | PFL_1989   | 2215930..2218167     | 746 | 83.604 | GGAG  | Hypothetical protein ORF002 from <i>Staphylococcus</i> phage 47 (AAX91193), 9e <sup>-54</sup>  | DNA primase domain protein PSPTO3418 from <i>Pseudomonas syringae</i> pv. <i>tomato</i> DC3000 (NP_793201); 0.0                   | Putative Ssb-like protein (COG5545)                                   |                      |
| PFL_1990              | PFL_1990   | 2218181..2218525     | 114 | 12.595 | GCGAA | None detected                                                                                  | Conserved hypothetical protein PSPTO3417 from <i>Pseudomonas syringae</i> pv. <i>tomato</i> DC3000 (NP_793200), 9e <sup>-45</sup> | Conserved hypothetical protein                                        |                      |
| PFL_1991              | <i>hol</i> | 2219046..2219390     | 114 | 11.988 | AGGGG | Holin from pyocin locus of <i>Pseudomonas aeruginosa</i> (BAA83151); 5e <sup>-28</sup>         | Hypothetical protein Pfl01_1137 from <i>Pseudomonas fluorescens</i> Pf0-1 (ABA72880); 2e <sup>-47</sup>                           | Holin                                                                 |                      |
| PFL_1992              | PFL_1992   | 2219596..2220168     | 190 | 20.878 | GGAC  | None detected                                                                                  | Conserved hypothetical protein PSPTO3413 from <i>Pseudomonas syringae</i> pv. <i>tomato</i> DC3000 (AAO56891), 2e <sup>-79</sup>  | Conserved hypothetical protein                                        |                      |

|          |          |                  |     |        |       |                                                                                             |                                                                                                                            |                                       |
|----------|----------|------------------|-----|--------|-------|---------------------------------------------------------------------------------------------|----------------------------------------------------------------------------------------------------------------------------|---------------------------------------|
| PFL_1993 | PFL_1993 | 2220134..2222185 | 683 | 76.840 | CAGAG | Phage terminase gp15 from <i>Wolbachia</i> phage WO (BAA89640), $6e^{-109}$                 | Putative terminase GpA from <i>Pseudomonas putida</i> GB-1 (ABY97103), 0.0                                                 | Phage terminase (COG5525)             |
| PFL_1994 | PFL_1994 | 2222187..2222393 | 68  | 7.601  | AAGAG | None detected                                                                               | Conserved hypothetical protein PSPTO3411 from <i>Pseudomonas syringae</i> pv. <i>tomato</i> DC3000 (AA056889), $2e^{-23}$  | Conserved hypothetical protein        |
| PFL_1995 | PFL_1995 | 2222393..2223874 | 493 | 55.288 | CAAGG | Phage portal protein from <i>Wolbachia</i> sp. bacteriophage WOcauB1(BAD16786), $1e^{-105}$ | Phage portal protein, lambda family PP_3044 from <i>Pseudomonas putida</i> KT2440 (AE016495), 0.0                          | Portal protein (COG5511)              |
| PFL_1996 | PFL_1996 | 2223871..2225013 | 380 | 40.265 | AGGAG | Putative protease Z3097 from <i>E.coli</i> O157:H7 prophage CP-933U (AAG57011), $8e^{-31}$  | Clp protease PSPTO3409 from <i>Pseudomonas syringae</i> pv. <i>tomato</i> DC3000 (AAO56887), $7e^{-142}$                   | Putative ClpP-like protease (COG0740) |
| PFL_1997 | PFL_1997 | 2225010..2225354 | 114 | 11.885 | AGGAA | None detected                                                                               | Conserved hypothetical protein PputGB1_1199 from <i>Pseudomonas putida</i> GB-1 (ABY97107), $2e^{-43}$                     | Conserved hypothetical protein        |
| PFL_1998 | PFL_1998 | 2225418..2226413 | 331 | 36.382 | GGAG  | Phage protein gp20 from <i>Wolbachia</i> sp. bacteriophage WO (BAA89645), $6e^{-51}$        | Conserved hypothetical protein PSPTO3407 from <i>Pseudomonas syringae</i> pv. <i>tomato</i> DC3000 (AAO56885), $8e^{-156}$ | Conserved hypothetical phage protein  |

|                       |          |                  |     |        |      |                                                                                                                      |                                                                                                                                  |                                        |
|-----------------------|----------|------------------|-----|--------|------|----------------------------------------------------------------------------------------------------------------------|----------------------------------------------------------------------------------------------------------------------------------|----------------------------------------|
| PFL_1999              | PFL_1999 | 2226416..2226730 | 104 | 11.328 | GGAG | None detected                                                                                                        | Conserved hypothetical protein PSPTO3406 from <i>Pseudomonas syringae</i> pv. <i>tomato</i> DC3000 (AAO56884), 4e <sup>-39</sup> | Conserved hypothetical protein         |
| PFL_2000              | PFL_2000 | 2226727..2227380 | 217 | 24.691 | GGAG | Putative phage-related protein from phage VP882 of <i>Vibrio parahaemolyticus</i> 882 (AAS38501), 1e <sup>-06</sup>  | Conserved hypothetical protein PSPTO3405 from <i>Pseudomonas syringae</i> pv. <i>tomato</i> DC3000 (AAO56883), 8e <sup>-75</sup> | Hypothetical phage protein             |
| PFL_2001              | PFL_2001 | 2227373..2227885 | 170 | 18.805 | GGTG | Hypothetical protein PRF10 from R pyocin region of <i>P.aeruginosa</i> PAO1 (BAA83152), 7e <sup>-28</sup>            | Conserved hypothetical protein PSPTO3404 <i>Pseudomonas syringae</i> pv. <i>tomato</i> DC3000 (AAO56882), 5e <sup>-66</sup>      | Hypothetical phage protein             |
| PFL_2002 <sup>d</sup> | PFL_2002 | 2227882..2228472 | 196 | 20.198 | GGAG | Putative baseplate assembly protein V from R pyocin region of <i>P.aeruginosa</i> PAO1 (BAA83153), 4e <sup>-53</sup> | Putative tail spike protein gpV from <i>Pseudomonas entomophila</i> L48 (AAO56881), 4e <sup>-67</sup>                            | Baseplate assembly protein V (COG4540) |
| PFL_2003              | PFL_2003 | 2228537..2228737 | 66  | 7.144  | GGAG | None detected                                                                                                        | Conserved hypothetical protein PSPTO3402 from <i>Pseudomonas syringae</i> pv. <i>tomato</i> DC3000 (AAO56880), 3e <sup>-09</sup> | Conserved hypothetical protein         |
| PFL_2004              | PFL_2004 | 2228742..2229068 | 108 | 12.072 | GGAG | Putative baseplate assembly protein W from R pyocin region of <i>P.aeruginosa</i> PAO1                               | Putative baseplate assembly protein gpW from <i>Pseudomonas</i>                                                                  | Baseplate assembly protein W (COG3628) |

|          |          |                  |     |        |       |                                                                                                                                                                      |                                                                                                                                                                        |                                   |
|----------|----------|------------------|-----|--------|-------|----------------------------------------------------------------------------------------------------------------------------------------------------------------------|------------------------------------------------------------------------------------------------------------------------------------------------------------------------|-----------------------------------|
| PFL_2005 | PFL_2005 | 2229065..2229946 | 293 | 31.192 | GGAG  | (BAA83155), 1e <sup>-35</sup><br>Baseplate J-like protein (baseplate or base of tail fiber) phage phi CTX of <i>P.aeruginosa</i> PAO1 (NP_490617), 3e <sup>-71</sup> | <i>entomophila</i> L48 (PSEEN4162), 6e <sup>-43</sup><br>Putative baseplate J-like protein gpJ from <i>Pseudomonas entomophila</i> L48 (PSEEN4161), 9e <sup>-110</sup> | Baseplate J protein (COG3948)     |
| PFL_2006 | PFL_2006 | 2229948..2230553 | 201 | 22.268 | GGAG  | Baseplate assembly protein gpI from Enterobacteria phage P2 (AAD03285), 2e <sup>-48</sup>                                                                            | Tail protein I PSPTO3399 from <i>Pseudomonas syringae</i> pv. <i>tomato</i> DC3000 (AAO56877), 4e <sup>-77</sup>                                                       | Tail protein I (COG4385)          |
| PFL_2007 | PFL_2007 | 2230550..2231776 | 408 | 42.749 | GGAC  | Phage-related tail fibre protein HR2 from R pyocin region of <i>P.aeruginosa</i> PAO1 (BAA83158), 5e <sup>-41</sup>                                                  | Putative tail fiber protein H PSPTO3398 from <i>Pseudomonas syringae</i> pv. <i>tomato</i> DC3000 (AAO56876), 3e <sup>-72</sup>                                        | Tail fiber protein H (COG5301)    |
| PFL_2008 | PFL_2008 | 2231776..2232558 | 260 | 25.745 | GGTG  | None detected                                                                                                                                                        | None detected                                                                                                                                                          | Hypothetical protein              |
| PFL_2009 | PFL_2009 | 2232704..2233870 | 388 | 42.051 | GGAG  | Phage tail sheath protein from R pyocin region of <i>P.aeruginosa</i> PAO1 (BAA83160), 1e <sup>-156</sup>                                                            | Putative baseplate J-like protein gpFI from <i>Pseudomonas entomophila</i> L48 (PSEEN4155), 0.0                                                                        | Tail sheath protein (COG3497)     |
| PFL_2010 | PFL_2010 | 2233889..2234392 | 169 | 18.403 | GGAG  | Contractile tube protein of <i>P.aeruginosa</i> phage PS17 (JC5192), 2e <sup>-57</sup>                                                                               | Major tail tube protein PSPTO3395 from <i>Pseudomonas syringae</i> pv. <i>tomato</i> DC3000 (AAO56873), 8e <sup>-84</sup>                                              | Major tail tube protein (COG3498) |
| PFL_2011 | PFL_2011 | 2234404..2234709 | 101 | 10.981 | AGGAA | Conserved hypothetical protein                                                                                                                                       | Conserved hypothetical protein                                                                                                                                         | Conserved hypothetical            |

|          |            |                      |     |        |      |                                                                                                                      |                                                                                                         |                                      |
|----------|------------|----------------------|-----|--------|------|----------------------------------------------------------------------------------------------------------------------|---------------------------------------------------------------------------------------------------------|--------------------------------------|
|          |            |                      |     |        |      | gp23 from bacteriophage WOcauB1 of <i>Wolbachia</i> sp. wCauB (BAD16807), $3e^{-051}$                                | PputW619_4038 from <i>Pseudomonas putida</i> W619 (ACA74518), $8e^{-32}$                                | protein                              |
| PFL_2012 | PFL_2012   | 2234717..2234821     | 33  | 3.964  | GGCG | None detected                                                                                                        | None detected                                                                                           | Hypothetical protein                 |
| PFL_2013 | PFL_2013   | 2234851..2237418     | 855 | 88.148 | GGTG | Tail tape measure protein PRF20 from R pyocin region of <i>P.aeruginosa</i> PAO1 (BAA83164), $4e^{-47}$              | Tail tape measure protein PSPTO3393 from <i>P. syringae</i> pv. <i>tomato</i> DC3000 (AAO56871), 0.0    | Tape measure protein (COG3941)       |
| PFL_2014 | PFL_2014   | 2237427..2238272     | 281 | 29.763 | GGAG | Protein PRF21 from R pyocin region of <i>P.aeruginosa</i> PAO1 (BAA83165), $3e^{-65}$                                | Hypothetical protein PSPTO3392 from <i>P. syringae</i> pv. <i>tomato</i> DC3000 (AAO56870), $5e^{-115}$ | Tail formation protein gpU (COG3499) |
| PFL_2015 | PFL_2015   | 2238247..2238453     | 68  | 7.322  | GGAG | Phage tail protein PRF22 (GpX) from R pyocin region of <i>P.aeruginosa</i> PAO1 (BAA83166), $6e^{-21}$               | Tail protein X PSPTO3391 from <i>P. syringae</i> pv. <i>tomato</i> DC3000 (AAO56869), $3e^{-24}$        | Tail protein X (COG5004)             |
| PFL_2016 | PFL_2016   | 2238450..2238920 (-) | 156 | 16.732 | GGAG | None detected                                                                                                        | None detected                                                                                           | Hypothetical protein                 |
| PFL_2017 | PFL_2017   | 2239001..2240044     | 347 | 38.005 | GGAG | Phage late control gene D protein PRF23(GpD) from R pyocin region of <i>P.aeruginosa</i> PAO1 (BAA83167), $2e^{-96}$ | Tail protein D PSPTO3390 from <i>P. syringae</i> pv. <i>tomato</i> DC3000 (AAO56868), $2e^{-160}$       | Late control protein gpD (COG3500)   |
| PFL_2018 | <i>lys</i> | 2240071..2240622     | 183 | 19.846 | GGAG | Lytic enzyme PRF24 from R pyocin region of <i>P.aeruginosa</i> PAO1 (BAA83168), $1e^{-35}$                           | Putative lysozyme PP_3066 from <i>Pseudomonas putida</i> KT2440 (AE016496), $1e^{-82}$                  | Endolysin (COG3179)                  |
| PFL_2019 | PFL_2019   | 2240619..2241140     | 173 | 18.154 | GGTG | Conserved phage protein gp78 from                                                                                    | Hypothetical protein PSPPH_0666 from                                                                    | Conserved phage protein              |

*Burkholderia cepacia*      *P. syringae* pv.  
phage Bcep22              *phaseolicola* 1448a  
(AAQ55012), 4e<sup>-05</sup>        (AAZ35483), 2e<sup>-42</sup>

---

<sup>a</sup> Only expectation values of 1e<sup>-05</sup> and below were considered as significant matches during BLAST database searches; <sup>b</sup> open reading frame(s) not present in the original genome annotation; <sup>d</sup> open reading frame has an alternative start site.
