# Supplementary material for: Mobile genetic elements in the genome of the beneficial rhizobacterium Pseudomonas fluorescens Pf-5
Source: PubMed Central journal article supplement (PMC2647930; doi:10.1186/1471-2180-9-8), 2009-01-13
Supplement: 1471-2180-9-8-S4.pdf [file 1471-2180-9-8-S4.pdf]

**Additional file 4 – Sequence analysis of prophage 06 of *P. fluorescens* Pf-5**

| CDS                   | Gene name   | Position                                      | Protein length (residues) | Protein mol weight (kDa) | Putative ribosome binding site | Closest protein of phage or pyocin origin (accession no.), blastp E-value <sup>a</sup>                      | Other similar proteins (accession no.), blastp E-value <sup>a</sup>                                                      | Predicted function (functional domains) |
|-----------------------|-------------|-----------------------------------------------|---------------------------|--------------------------|--------------------------------|-------------------------------------------------------------------------------------------------------------|--------------------------------------------------------------------------------------------------------------------------|-----------------------------------------|
| PFL_3739 (tRNA-Ser)   | <i>attL</i> | 4338363..4338465 (within tRNA-Ser – PFL_3739) |                           |                          |                                | CGGTCTTGAAAACCGCCGACTGTAACAGGTCCTAGAGTTCGAATCTCTACGCCTCCGCCAAATCTCAACGA<br>AAAAGCCCTGATTTTTCAGGGCTTTTTTGTGT |                                                                                                                          |                                         |
| PFL_3740 <sup>d</sup> | PFL_3740    | 4339018..4339722                              | 234                       | 26.170                   | GGAG                           | Hyp prot STM1053 from Gifsi-2 prophage of <i>Salmonella typhimurium</i> LT2 (NP_460027), 1e <sup>-33</sup>  | Hypothetical protein PFL_3796 from <i>Pseudomonas fluorescens</i> Pf-5 (AAY93060), 8e <sup>-115</sup>                    | Phage related conserved protein         |
| PFL_3741              | PFL_3741    | 4339894..4340019                              | 41                        | 4.845                    | GGAC                           | None detected                                                                                               | None detected                                                                                                            | Hypothetical protein                    |
| 2 <sup>b</sup>        | <i>orf2</i> | 4340357..4341193                              | 278                       | 29.888                   | CATGG                          | None detected                                                                                               | Fimbrial protein Rpic12DDRAFT_0572 from <i>Ralstonia pickettii</i> 12D (EDN39228), 1e-26                                 | P-pilus assembly protein FimA (COG3539) |
| PFL_3742              | PFL_3742    | 4341320..4341841 (-)                          | 173                       | 19.114                   | CAGG                           | Lysis protein Bcep22gene80 from Burkholderia phage Bcep22 (AAQ55012), 2e-05                                 | Probable phage signal peptide protein PflO1_1173 from <i>Pseudomonas fluorescens</i> Pf-01 (ABA72916), 8e <sup>-53</sup> | Hypothetical phage protein              |
| PFL_3743              | PFL_3743    | 4342413..4341838 (-)                          | 191                       | 20.768                   | AGCAG                          | Hypothetical protein Orf21 from <i>Pseudomonas aeruginosa</i> phage D3112 (AAQ94459), 2e <sup>-29</sup>     | Putative protein P5 from <i>Pseudomonas putida</i> KT2440 (AAN67204), 1e <sup>-66</sup>                                  | Phage related hypothetical protein      |
| 3 <sup>b</sup>        | <i>orf3</i> | 4342430..4343254 (-)                          | 274                       | 30.112                   | ACGG                           | None detected                                                                                               | Hypothetical protein PputW619_1354 from <i>Pseudomonas putida</i> W619 (ACA71859), 4e <sup>-15</sup>                     | Conserved hypothetical protein          |

|                       |             |                      |      |         |       |                                                                                                                          |                                                                                                                                    |                                          |
|-----------------------|-------------|----------------------|------|---------|-------|--------------------------------------------------------------------------------------------------------------------------|------------------------------------------------------------------------------------------------------------------------------------|------------------------------------------|
| 4 <sup>b</sup>        | <i>orf4</i> | 4343254..4343544 (-) | 96   | 10.410  | GTGG  | None detected                                                                                                            | None detected                                                                                                                      | Hypothetical protein                     |
| PFL_3744              | PFL_3744    | 4346630..4343541 (-) | 1029 | 112.311 | GAAGG | Tail tip fiber protein gp62 from <i>Burkholderia</i> phage Bcep176 (ABA60063), 0.0                                       | Probable bacteriophage protein Rsc1698 from <i>Ralstonia solanacearum</i> GMI1000 (CAD15400), 0.0                                  | Tail tip fiber protein (COG4733)         |
| PFL_3745 <sup>d</sup> | PFL_3745    | 4346688..4347269 (-) | 193  | 20.380  | GAGG  | Phage protein gp20 from <i>Klebsiella</i> phage phiK02 (AAR83036), 1e <sup>-41</sup>                                     | Putative phage tail assembly protein xcc-b100_3327 from <i>Xanthomonas campestris</i> pv. <i>campestris</i> B100 (CAP52692), 1e-47 | Tail sheath protein (COG4723)            |
| 5 <sup>b</sup>        | <i>orf5</i> | 4347322..4347741 (-) | 139  | 14.391  | GAGG  | None detected                                                                                                            | Putative lipoprotein YPMT1.32 from plasmid pMT1 of <i>Yersinia pestis</i> CO92 (NP_395370), 6e <sup>-13</sup>                      | Conserved hypothetical protein           |
| PFL_3746              | PFL_3746    | 4348646..4347840 (-) | 268  | 29.125  | GAGG  | Hypothetical protein Orf44 of <i>Shigella flexneri</i> phage V (NP_599076), 8e <sup>-27</sup>                            | Hypothetical protein UTI89_C5105 from <i>Escherichia coli</i> UTI89 (ABE10505), 8e <sup>-27</sup>                                  | Phage protein of Kila superfamily        |
| PFL_3747 <sup>d</sup> | PFL_3747    | 4348643..4349617 (-) | 324  | 36.286  | GAGG  | Putative antirepressor Ant from <i>Actinobacillus actinomycetemcomitans</i> phage Aaphi23 (NP_852746), 8e <sup>-28</sup> | Putative antirepressor PputGB1_3400 from <i>Pseudomonas putida</i> GB-1 (ABY99291), 3e <sup>-36</sup>                              | Putative antirepressor protein (COG3617) |
| 6 <sup>b</sup>        | <i>orf6</i> | 4349875..4350303     | 142  | 15.833  | TGGAA | Probable phage regulatory protein YPO2125 from <i>Yersinia pestis</i> CO92 (AD0259), 6e <sup>-16</sup>                   | Putative phage protein y2192 from <i>Yersinia pestis</i> KIM (NP_669502), 5e <sup>-16</sup>                                        | Conserved hypothetical phage protein     |
| PFL_3748              | PFL_3748    | 4350411..4351133     | 240  | 25.710  | GGAG  | None detected                                                                                                            | None detected                                                                                                                      | Hypothetical protein                     |
| 7 <sup>b</sup>        | <i>orf7</i> | 4351174..4351335 (-) | 53   | 6.023   | GAGG  | None detected                                                                                                            | None detected                                                                                                                      | Hypothetical                             |

|                 |              |                      |      |         |       |                                                                                                                      |                                                                                                                            |                                         |
|-----------------|--------------|----------------------|------|---------|-------|----------------------------------------------------------------------------------------------------------------------|----------------------------------------------------------------------------------------------------------------------------|-----------------------------------------|
| 8 <sup>b</sup>  | <i>orf8</i>  | 4351350..4351940 (-) | 196  | 22.441  | GTGG  | None detected                                                                                                        | Hypothetical protein VCA0293 from <i>Vibrio cholerae</i> O1 biovar eltor str. N16961 (NP_232689), 7e <sup>-28</sup>        | protein Conserved hypothetical protein  |
| 9 <sup>b</sup>  | <i>orf9</i>  | 4352112..4352741     | 209  | 24.221  | GGAG  | None detected                                                                                                        | Hypothetical protein PCNPT3_06151 from <i>Psychromonas</i> sp. CNPT3 (EAS39057), 1e-19                                     | Conserved hypothetical protein          |
| PFL_3749        | PFL_3749     | 4352798..4353562 (-) | 254  | 28.637  | GGAG  | Tail component protein gp19 of <i>Burkholderia thailandensis</i> phage phiE125 (NP_536375), 2e <sup>-62</sup>        | Putative phage protein gp64 from <i>Burkholderia pseudomallei</i> 305 (EBA50886), 7e <sup>-70</sup>                        | Tail protein K (COG1310)                |
| PFL_3750        | PFL_3750     | 4353565..4354248 (-) | 227  | 24.958  | GAGG  | Putative minor tail protein gp18 from <i>Burkholderia thailandensis</i> phage phiE125 (NP_536374), 3e <sup>-52</sup> | Probable phage hk022 gp18-related protein RSc1694 from <i>Ralstonia solanacearum</i> GMI1000 (CAD15396), 2e <sup>-84</sup> | Minor phage tail protein (COG4672)      |
| PFL_3751        | PFL_3751     | 4354276..4355469 (-) | 397  | 41.596  | CAGG  | L-shaped tail fiber protein (LTF) of <i>E.coli</i> bacteriophage T5 (AAU05270), 5e <sup>-43</sup>                    | Neck appendage protein precursor GA-1p31 of <i>Bacillus</i> phage GA-1 (NP_073695), 5e <sup>-13</sup>                      | Phage tail fiber protein                |
| PFL_3752        | PFL_3752     | 4355466..4355843 (-) | 125  | 14.016  | GGCG  | Putative tail protein gp16 of <i>Klebsiella</i> bacteriophage phiK02 (AAR83032), 3e <sup>-28</sup>                   | Minor tail protein M PSEEN4176 from <i>Pseudomonas entomophila</i> L48 (CAK16867), 9e <sup>-34</sup>                       | Minor phage tail protein M (COG4718)    |
| 10 <sup>b</sup> | <i>orf10</i> | 4355861..4356172 (-) | 103  | 11.234  | GAGG  | None detected                                                                                                        | None detected                                                                                                              | Hypothetical protein                    |
| PFL_3753        | PFL_3753     | 4356172..4359495 (-) | 1107 | 116.614 | GAGAG | Putative tail component protein Orf45 from <i>Pseudomonas</i>                                                        | Phage tail tape measure protein PSPA_2417 from <i>Pseudomonas</i>                                                          | Putative phage tail length tape measure |

|                 |              |                      |     |        |       |                                                                                                                                                              |                                                                                                                                                |                                                     |
|-----------------|--------------|----------------------|-----|--------|-------|--------------------------------------------------------------------------------------------------------------------------------------------------------------|------------------------------------------------------------------------------------------------------------------------------------------------|-----------------------------------------------------|
| 11 <sup>b</sup> | <i>orf11</i> | 4359492..4359743 (-) | 83  | 9.053  | GAAGA | <i>aeruginosa</i> PAS429 phage D3112 (AAQ94483), 3e <sup>-84</sup><br>Hypothetical protein rtp36 from Enterobacteria phage RTP (CAJ42240), 2e <sup>-07</sup> | <i>aeruginosa</i> PA7 (ABR86240), 0.0<br>Putative phage protein PSPA_2416 from <i>Pseudomonas aeruginosa</i> PA7 (ABR84058), 1e <sup>-19</sup> | protein (COG5281)<br>Conserved hypothetical protein |
| PFL_3754        | PFL_3754     | 4359809..4360189 (-) | 125 | 13.978 | GGTG  | None detected                                                                                                                                                | Hypothetical protein PSPA7_2415 from <i>Pseudomonas aeruginosa</i> PA7 (ABR85104), 6e <sup>-37</sup>                                           | Conserved hypothetical protein                      |
| PFL_3755        | PFL_3755     | 4360193..4360849 (-) | 218 | 22.959 | AGGAA | Protein TsbA from Enterobacteria phage TLS (AAR09272), 6e <sup>-30</sup>                                                                                     | Hypothetical protein Psyr_2783 from <i>Pseudomonas syringae</i> pv. <i>syringae</i> B728a (AAY37822), 2e <sup>-48</sup>                        | Conserved hypothetical phage protein                |
| 12 <sup>b</sup> | <i>orf12</i> | 4360938..4361198 (-) | 86  | 9.601  | CAGG  | None detected                                                                                                                                                | Hypothetical protein                                                                                                                           | Hypothetical protein                                |
| PFL_3756        | PFL_3756     | 4361252..4361668 (-) | 138 | 15.051 | AGGA  | None detected                                                                                                                                                | Hypothetical protein Psyr_2784 from <i>Pseudomonas syringae</i> pv. <i>syringae</i> B728a (AAY37823), 1e <sup>-31</sup>                        | Conserved hypothetical protein                      |
| PFL_3757        | PFL_3757     | 4361665..4362318 (-) | 217 | 23.788 | GGTG  | Hypothetical protein BPKS7gp02 from <i>Salmonella</i> phage KS7 (AAW51205), 4e-14                                                                            | Conserved hypothetical protein PputGB1_3411 from <i>Pseudomonas putida</i> GB-1 (ABY99302), 6e-91                                              | Conserved hypothetical phage protein                |
| PFL_3758        | PFL_3758     | 4362315..4362683 (-) | 122 | 13.560 | GGAG  | Putative phage protein BB2223 from <i>Bordetella bronchiseptica</i> RB50 (NP_888767), 1e <sup>-12</sup>                                                      | Hypothetical protein Psyr_2786 from <i>Pseudomonas syringae</i> pv. <i>syringae</i> B728a (AAY37825), 1e <sup>-46</sup>                        | Conserved hypothetical phage protein                |
| PFL_3759        | PFL_3759     | 4362700..4363203 (-) | 167 | 18.314 | GCGAG | Hypothetical protein SPSV3_gp41 from                                                                                                                         | Hypothetical protein Psyr_2787 from                                                                                                            | Conserved hypothetical                              |

|          |          |                      |     |        |       |                                                                                               |                                                                                                                                                                                        |                                                 |
|----------|----------|----------------------|-----|--------|-------|-----------------------------------------------------------------------------------------------|----------------------------------------------------------------------------------------------------------------------------------------------------------------------------------------|-------------------------------------------------|
| PFL_3760 | PFL_3760 | 4363207..4363515 (-) | 102 | 11.269 | GGAG  | <i>Salmonella</i> phage SETP3 (ABN47370), 5e-09<br>None detected                              | <i>Pseudomonas syringae</i> pv. <i>syringae</i> B728a (AAY37826), 5e-70<br>Hypothetical protein Psyr_2788 from <i>Pseudomonas syringae</i> pv. <i>syringae</i> B728a (AAY37827), 6e-14 | phage protein<br>Conserved hypothetical protein |
| PFL_3761 | PFL_3761 | 4363567..4364514 (-) | 315 | 33.877 | GGAG  | Major capsid protein orf18 from <i>Listonella pelagia</i> phage phiHSIC (AAW67515), 2e-115    | Conserved hypothetical protein PputGB1_3415 from <i>Pseudomonas putida</i> GB-1 (ABY99306), 2e-141                                                                                     | Conserved hypothetical protein                  |
| PFL_3762 | PFL_3762 | 4364526..4365242 (-) | 238 | 25.772 | GGAG  | Hypothetical protein ORF009 from <i>Pseudomonas</i> phage 73 (YP_001293416), 1e-16            | Conserved hypothetical protein PputGB1_3416 from <i>Pseudomonas putida</i> GB-1 (ABY99307), 2e-89                                                                                      | Conserved hypothetical phage protein            |
| PFL_3763 | PFL_3763 | 4365352..4365819     | 155 | 17.507 | AGGAA | None detected                                                                                 | Hypothetical protein BpseB_41036 from <i>Burkholderia pseudomallei</i> B7210 (ZP_02477197), 1e-07                                                                                      | Conserved hypothetical protein                  |
| PFL_3764 | PFL_3764 | 4365833..4366921 (-) | 362 | 40.052 | GGAG  | Hypothetical protein BPKS7gp13 from <i>Salmonella</i> phage KS7 (AAW51216), 1e <sup>-56</sup> | Hypothetical protein Psyr_2729 from <i>Pseudomonas syringae</i> pv. <i>syringae</i> B728a (AAY37831), 5e <sup>-148</sup>                                                               | Putative phage minor head protein               |
| PFL_3765 | PFL_3765 | 4366896..4368359 (-) | 487 | 53.748 | GGGAT | Phage protein BcepGomrgp05 from <i>Burkholderia</i> phage BcepGomr (ABP63576), 4e-93          | Hypothetical protein Psyr_2793 from <i>Pseudomonas syringae</i> pv. <i>syringae</i> B728a (AAY37832), 2e <sup>-109</sup>                                                               | Conserved hypothetical phage protein            |
| PFL_3766 | PFL_3766 | 4368356..4369657 (-) | 433 | 48.921 | AGGA  | Putative phage terminase from <i>Salmonella</i> phage SETP7 (ABN70692), 4e-93                 | Hypothetical protein Psyr_2794 from <i>Pseudomonas syringae</i> pv. <i>syringae</i> B728a                                                                                              | Phage terminase                                 |

|                       |              |                      |     |        |       |                                                                                     |                                                                                                                                  |                                                |
|-----------------------|--------------|----------------------|-----|--------|-------|-------------------------------------------------------------------------------------|----------------------------------------------------------------------------------------------------------------------------------|------------------------------------------------|
| PFL_3767              | PFL_3767     | 4369644..4370105 (-) | 153 | 17.379 | GGATG | Hypothetical phage protein y2212 from <i>Yersinia pestis</i> KIM (NP_669521), 8e-41 | (AAAY37833), 0.0<br>Hypothetical protein Psyr_2795 from <i>Pseudomonas syringae</i> pv. <i>syringae</i> B728a (AAAY37834), 6e-63 | Conserved hypothetical phage protein (COG5556) |
| PFL_3768              | PFL_3768     | 4370137..4370745 (-) | 202 | 22.410 | GTGAG | None detected                                                                       | Hypothetical protein Pput_3382 from <i>Pseudomonas putida</i> F1 (ABQ79508), 7e-99                                               | Conserved hypothetical protein                 |
| 13 <sup>b</sup>       | <i>orf13</i> | 4370770..4371120 (-) | 115 | 12.117 | GGAAG | None detected                                                                       | None detected                                                                                                                    | Hypothetical protein                           |
| PFL_3769              | PFL_3769     | 4371186..4371416 (-) | 76  | 8.500  | GGAG  | Hypothetical protein PHG25p104nc from <i>Aeromonas</i> phage 25 (ABF72662), 2e-12   | Hypothetical protein Psyr_2800 from <i>Pseudomonas syringae</i> pv. <i>syringae</i> B728a (AAAY37839), 2e-33                     | Conserved hypothetical phage protein           |
| PFL_3770 <sup>d</sup> | <i>hol</i>   | 4371474..4371797 (-) | 107 | 11.502 | AGGA  | Putative holin from <i>Pseudomonas</i> phage F10 (EAZ62533), 5e-24                  | Phage holin of lambda family PP_1559 from <i>Pseudomonas putida</i> KT2440 (AE016345), 3e-34                                     | Holin                                          |
| 14 <sup>b</sup>       | <i>orf14</i> | 4371912..4372232 (-) | 106 | 11.728 | GGAG  | None detected                                                                       | None detected                                                                                                                    | Hypothetical protein                           |
| PFL_3771 <sup>d</sup> | PFL_3771     | 4372668..4372931 (-) | 87  | 10.109 | GAGG  | None detected                                                                       | Hypothetical protein CPS_2864 from <i>Colwellia psychrerythraea</i> 34H (AAZ26042); 7e-16                                        | Conserved hypothetical protein                 |
| PFL_3772              | PFL_3772     | 4373055..4373750 (-) | 231 | 25.254 | GAGG  | Phage protein Orf84 <i>Pseudomonas aeruginosa</i> phage D3 (AAF80840); 4e-49        | Hypothetical protein Pput_4123 from <i>Pseudomonas putida</i> F1 (ABQ80247); 3e-66                                               | Conserved hypothetical phage protein           |
| PFL_3773              | PFL_3773     | 4373747..4374337 (-) | 196 | 22.262 | GGAG  | Protein Orf82 of <i>Pseudomonas aeruginosa</i> phage D3 (AAF80838); 1e-39           | Hypothetical protein Psyr_2806 from <i>Pseudomonas syringae</i> pv. <i>syringae</i> B728a                                        | NinG-like conserved phage protein              |

|                       |              |                      |     |        |       |                                                                                            |                                                                                                                          |                                            |
|-----------------------|--------------|----------------------|-----|--------|-------|--------------------------------------------------------------------------------------------|--------------------------------------------------------------------------------------------------------------------------|--------------------------------------------|
| PFL_3774              | PFL_3774     | 4374337..4374924 (-) | 195 | 22.046 | GGAG  | Protein Orf79 of <i>Pseudomonas aeruginosa</i> phage D3 (NP_061575); 2e-91                 | (AAY37845), 4e-67<br>Hypothetical prophage protein EcolE2_01003004 from <i>Escherichia coli</i> E22 (ZP_00728702); 6e-36 | Conserved hypothetical phage protein       |
| PFL_3775              | PFL_3775     | 4374917..4375717 (-) | 266 | 28.401 | GGAG  | Hypothetical protein F116p33 from <i>Pseudomonas</i> phage F116 (AAT47229), 6e-41          | Hypothetical protein Psyr_2809 from <i>Pseudomonas syringae</i> pv. <i>syringae</i> B728a (AAY37848), 3e-74              | Conserved hypothetical phage protein       |
| PFL_3776              | PFL_3776     | 4375704..4376678 (-) | 324 | 36.041 | GGAG  | Hypothetical protein F116p32 from <i>Pseudomonas</i> phage F116 (AAT47228), 6e-37          | Hypothetical protein Psyr_2810 from <i>Pseudomonas syringae</i> pv. <i>syringae</i> B728a (AAY37849), 4e-162             | Conserved hypothetical phage protein       |
| 15 <sup>b</sup>       | <i>orf15</i> | 4376680..4377099 (-) | 139 | 15.333 | GGTG  | Protein gp75 from <i>Mycobacterium</i> phage Tweety (ABQ86144), 4e-07                      | Putative helicase sce8204 from <i>Sorangium cellulosum</i> 'So ce 56' (CAN98374), 1e-08                                  | Putative endonuclease (COG1403)            |
| PFL_3777              | PFL_3777     | 4377096..4378115 (-) | 339 | 38.379 | CAGG  | Putative DNA-binding protein (Roi) from <i>Pseudomonas</i> phage F10 (YP_001293393), 3e-41 | Putative prophage antirepressor from <i>Pseudomonas putida</i> GB-1 (ABY99331), 1e-67                                    | Putative DNA-binding Roi protein (COG3646) |
| PFL_3778              | PFL_3778     | 4378344..4378748 (-) | 134 | 14.626 | GAAGG | None detected                                                                              | None detected                                                                                                            | Hypothetical protein                       |
| PFL_3779 <sup>d</sup> | PFL_3779     | 4372668..4372931 (-) | 191 | 20.984 | AGAAG | None detected                                                                              | Hypothetical protein Psyr_2811 from <i>Pseudomonas syringae</i> pv. <i>syringae</i> B728a (AAY37850), 5e-40              | Conserved hypothetical protein             |
| PFL_6232              | PFL_6232     | 4379256..4379459 (-) | 67  | 7.173  | GTGG  | Cro-like protein from <i>Pseudomonas</i> phage F116 (AAT45880), 2e-                        | Hypothetical protein EcolO15_30369 from <i>Escherichia coli</i>                                                          | Cro-like phage repressor                   |

|                       |                |                  |     |        |       |                                                                                              |                                                                                                                                                           |                                         |
|-----------------------|----------------|------------------|-----|--------|-------|----------------------------------------------------------------------------------------------|-----------------------------------------------------------------------------------------------------------------------------------------------------------|-----------------------------------------|
| PFL_3780              | <i>cro</i> /CI | 4380364..4379576 | 262 | 29.061 | AATAA | 06<br>Transcriptional regulator F116p29 from <i>Pseudomonas</i> phage F116 (AAT45979), 5e-48 | O157:H7 str. EC4501 (ZP_0279077), 2e-07<br>Transcriptional regulator PFL_2126 of Cro/CI family from <i>Pseudomonas fluorescens</i> Pf-5 (AAY91400), 2e-80 | Cro/CI-type repressor protein (COG2932) |
| PFL_3781 <sup>d</sup> | PFL_3781       | 4380420..4380965 | 181 | 19.221 | GGAC  | None detected                                                                                | Hypothetical protein PTD2_04771 from <i>Pseudoalteromonas tunicata</i> D2 (EAR26471), 3e-08                                                               | Conserved hypothetical protein          |
| 16 <sup>b</sup>       | <i>orf16</i>   | 4381010..4381246 | 78  | 8.746  | GGAG  | None detected                                                                                | Conserved hypothetical protein PP3898 from <i>Pseudomonas putida</i> KT2440 (AE016583); 1e-21                                                             | Conserved hypothetical protein          |
| 17 <sup>b</sup>       | <i>orf17</i>   | 4381398..4382315 | 305 | 34.953 | AAGGA | None detected                                                                                | Hypothetical protein Pden_2054 from <i>Paracoccus denitrificans</i> PD1222 (ABL70146), 9e-62                                                              | Conserved hypothetical protein          |
| 18 <sup>b</sup>       | <i>orf18</i>   | 4382440..4383309 | 289 | 31.072 | GGAG  | Hypothetical protein SPSV3_gp50 from <i>Salmonella</i> phage SETP3 (ABN47379), 9e-06         | Hypothetical protein Pput_3368 from <i>Pseudomonas putida</i> F1 (ABQ79494); 6e-14                                                                        | Conserved hypothetical phage protein    |
| 19 <sup>b</sup>       | <i>orf19</i>   | 4383868..4384068 | 66  | 7.096  | GGAG  | None detected                                                                                | None detected                                                                                                                                             | Hypothetical protein                    |
| PFL_3782 <sup>d</sup> | PFL_3782       | 4384141..4384341 | 66  | 7.230  | GAGG  | None detected                                                                                | Hypothetical protein Pput_4133 from <i>Pseudomonas putida</i> F1 (ABQ80257), 2e-25                                                                        | Conserved hypothetical protein          |
| PFL_3783              | PFL_3783       | 4384849..4385280 | 143 | 16.040 | GGAG  | None detected                                                                                | None detected                                                                                                                                             | Hypothetical protein                    |
| PFL_3784              | PFL_3784       | 4385268..4385468 | 66  | 7.368  | AGAG  | None detected                                                                                | Hypothetical protein                                                                                                                                      | Conserved                               |



|                       |              |                      |     |        |       |                                                                                   |                                                                                       |                                                                               |                                      |
|-----------------------|--------------|----------------------|-----|--------|-------|-----------------------------------------------------------------------------------|---------------------------------------------------------------------------------------|-------------------------------------------------------------------------------|--------------------------------------|
|                       |              |                      |     |        |       |                                                                                   |                                                                                       | Psyr_2819 from <i>P. syringae</i> pv. <i>syringae</i> B728a (AAY37858), 4e-12 | hypothetical protein                 |
| PFL_3785              | PFL_3785     | 4385465..4385665     | 66  | 7.667  | GGAG  | None detected                                                                     | None detected                                                                         | None detected                                                                 | Hypothetical protein                 |
| PFL_3786              | PFL_3786     | 4385662..4385835     | 57  | 6.075  | GGAG  | None detected                                                                     | None detected                                                                         | None detected                                                                 | Hypothetical protein                 |
| PFL_3787              | PFL_3787     | 4385975..4386721     | 248 | 27.801 | GGAG  | Hypothetical protein F116p19 from <i>Pseudomonas</i> phage F116 (AAT47218), 5e-40 | Hypothetical protein Pput_3410 from <i>Pseudomonas putida</i> F1 (ABQ79536), 2e-42    | Hypothetical protein                                                          | Conserved hypothetical phage protein |
| PFL_3788 <sup>d</sup> | PFL_3788     | 4386718..4387281     | 187 | 21.203 | GGTG  | Phage protein Orf027 from <i>Staphylococcus</i> phage 42E (AAX91139); 2e-11       | Hypothetical protein Pput_3411 from <i>Pseudomonas putida</i> F1 (ABQ79537), 2e-74    | Hypothetical protein                                                          | Conserved hypothetical phage protein |
| PFL_3789              | PFL_3789     | 4387289..4387516     | 75  | 8.138  | GAGG  | None detected                                                                     | None detected                                                                         | None detected                                                                 | Hypothetical protein                 |
| 20 <sup>b</sup>       | <i>orf20</i> | 4387513..4387974     | 153 | 17.159 | GGAG  | None detected                                                                     | Hypothetical proteins PP_3907 from <i>Pseudomonas putida</i> KT2440 (AAN69501), 2e-51 | Hypothetical proteins                                                         | Conserved hypothetical protein       |
| PFL_3790              | PFL_3790     | 4388056..4388367     | 103 | 11.534 | GAGG  | None detected                                                                     | None detected                                                                         | None detected                                                                 | Hypothetical protein                 |
| 21 <sup>b</sup>       | <i>orf21</i> | 4388364..4387974 (-) | 100 | 11.124 | GGAG  | None detected                                                                     | None detected                                                                         | None detected                                                                 | Hypothetical protein                 |
| 22 <sup>b</sup>       | <i>orf22</i> | 4388758..4389312 (-) | 184 | 20.420 | GGAG  | None detected                                                                     | None detected                                                                         | None detected                                                                 | Hypothetical protein                 |
| 23 <sup>b</sup>       | <i>orf23</i> | 4389570..4389312     | 72  | 7.996  | GAAGG | None detected                                                                     | None detected                                                                         | None detected                                                                 | Hypothetical protein                 |
| PFL_3791              | PFL_3791     | 4390090..4390848     | 252 | 29.117 | GGAG  | None detected                                                                     | Hypothetical protein pCAR1_p090 from plasmid pCAR1 of <i>Pseudomonas resinovorans</i> | Hypothetical protein                                                          | Conserved hypothetical protein       |

|                 |              |                      |                                                                                                              |        |      |                                                                                                   |                                                                                                                             |                                                                    |
|-----------------|--------------|----------------------|--------------------------------------------------------------------------------------------------------------|--------|------|---------------------------------------------------------------------------------------------------|-----------------------------------------------------------------------------------------------------------------------------|--------------------------------------------------------------------|
| 24 <sup>b</sup> | <i>orf24</i> | 4390913..4391575 (-) | 220                                                                                                          | 24.712 | GGTG | None detected                                                                                     | (BAC41609); 2e-49<br>Hypothetical protein<br>V12G01_17162 from<br><i>Vibrio alginolyticus</i><br>12G01 (EAS76997),<br>6e-12 | Conserved<br>hypothetical<br>protein                               |
| PFL_3792        | PFL_3792     | 4391626..4393281     | 551                                                                                                          | 58.551 | GGAG | Dam DNA<br>methyltransferase from<br>Enterobacteria phage P7<br>(AAQ07538), 3e-81                 | DNA-cytosine<br>methyltransferase<br>PP_3912 from<br><i>Pseudomonas putida</i><br>KT2440 (AE016584),<br>0.0                 | Putative<br>Cytosine-C5-<br>specific DNA<br>methylase<br>(COG0270) |
| PFL_3793        | PFL_3793     | 4393336..4393491     | 51                                                                                                           | 5.958  | GGAG | None detected                                                                                     | None detected                                                                                                               | Hypothetical<br>protein                                            |
| 25 <sup>b</sup> | <i>orf25</i> | 4393528..4393770     | 80                                                                                                           | 9.206  | GGAG | Hypothetical protein<br>PPF10_gp029 from<br><i>Pseudomonas</i> phage F10<br>(YP_001293373), 2e-07 | Hypothetical protein<br>PSEEN2227 from<br><i>Pseudomonas</i><br><i>entomophila</i> L48<br>(CAK15046), 1e-23                 | Conserved<br>hypothetical<br>phage protein                         |
| PFL_3794        | <i>int7</i>  | 4393772..4394821     | 349                                                                                                          | 40.200 | GGTG | Integrase PPF10_gp028<br>from <i>Pseudomonas</i><br>phage F10<br>(YP_001293372), 1e-<br>100       | Site-specific<br>recombinase<br>PSSEEN2226 from<br><i>Pseudomonas</i><br><i>entomophila</i> L48<br>(CAK15045), 6e-163       | Putative phage<br>integrase                                        |
| PFL_3795        | <i>attR</i>  | 4394946..4395048     | CGGTCTTGAAAACCGCCGACTGTAACAGGTCCTAGAGTTCGAATCTCTACGCCTCCGCCAAATCTCAACGA<br>GAAAGCCCTGATTTTTTCAGGGCTTTTTTGTGT |        |      |                                                                                                   |                                                                                                                             | Degenerate<br>IS5 family<br>transposase                            |
| PFL_3796        | PFL_3796     | 4395264..4395443 (-) | na                                                                                                           | na     | na   |                                                                                                   |                                                                                                                             | Conserved<br>hypothetical<br>protein<br>(COG2135)                  |
| PFL_3796        | PFL_3796     | 4396430..4397113     | 227                                                                                                          | 25.373 | GAGG | Hypothetical protein<br>F116p67 from<br><i>Pseudomonas</i> phage<br>F116 (AAT47256), 2e-<br>81    | Hypothetical protein<br>PFL_3740 from<br><i>Pseudomonas</i><br><i>fluorescens</i> Pf-5<br>(AAY93005), 2e-114                | Conserved<br>hypothetical<br>protein<br>(COG2135)                  |
| 26 <sup>b</sup> | <i>orf26</i> | 4397357..4397668     | 103                                                                                                          | 11.628 | GGAG | None detected                                                                                     | Hypothetical protein<br>Bpse38_13628 from                                                                                   | Conserved<br>hypothetical                                          |

|                            |            |                                                                                                           |     |        |               |                                                                                              |                                                                                                                                                       |                                                 |
|----------------------------|------------|-----------------------------------------------------------------------------------------------------------|-----|--------|---------------|----------------------------------------------------------------------------------------------|-------------------------------------------------------------------------------------------------------------------------------------------------------|-------------------------------------------------|
| PFL_3797                   | PFL_3797   | 4397801..4398301 (-)                                                                                      | 166 | 18.209 | GGTG          | Phage tail protein from <i>Salmonella</i> phage E1 (CAM33114), 5e-06                         | <i>Burkholderia thailandensis</i> MSMB43 (ZP_02464405), 1e-09<br>Conserved hypothetical protein from <i>Pseudomonas putida</i> W619 (ACA71862), 2e-14 | protein<br>Conserved hypothetical phage protein |
| PFL_3798                   | <i>lys</i> | 4398298..4398837 (-)                                                                                      | 179 | 19.273 | GCGG          | Lytic protein from <i>Pseudomonas</i> phage F10 (YP_001293405), 2e-44                        | Predicted chitinase from <i>Pseudomonas aeruginosa</i> 2192 (ZP_00973864), 5e-51                                                                      | Endolysin (COG3179)                             |
| PFL_3799                   | PFL_3799   | 4398828..4398923                                                                                          | 31  | 3.462  | None detected | None detected                                                                                | None detected                                                                                                                                         | Hypothetical protein                            |
| PFL_3780                   | PFL_3780   | 4399227..4400075                                                                                          | 282 | 30.161 | AGGA          | Hypothetical protein PaP3p20 from <i>Pseudomonas aeruginosa</i> phage PaP3 (AAL85552), 1e-22 | Phage particle protein from <i>Pseudomonas</i> phage LUZ24 (CAP45450), 5e-21                                                                          | Conserved hypothetical phage protein            |
| Alignment of attL and attR | attL       | CGGTCTTGAAAACCGCCGACTGTAACAGGTCCTAGAGTTCGAATCTCTACGCCTCCGCCAAATCTCAACGAAAAAGCCCTGATTTTTTCAGGGCTTTTTTGTGT  |     |        |               |                                                                                              |                                                                                                                                                       |                                                 |
|                            | attR       | CGGTCTTGAAAACCGCCGACTGTAACAGGTCCTAGAGTTCGAATCTCTACGCCTCCGCCAAATCTCAACGAGAAAAGCCCTGATTTTTTCAGGGCTTTTTTGTGT |     |        |               |                                                                                              |                                                                                                                                                       |                                                 |

<sup>a</sup> Only expectation values of  $1e^{-05}$  and below were considered as significant matches during BLAST database searches; <sup>b</sup> open

reading frame(s) not present in the original genome annotation; <sup>c</sup> open reading frame contains internal frameshifts; <sup>d</sup> open reading

frame has an alternative start site.
