# Supplementary material for: Mobile genetic elements in the genome of the beneficial rhizobacterium Pseudomonas fluorescens Pf-5
Source: PubMed Central journal article supplement (PMC2647930; doi:10.1186/1471-2180-9-8), 2009-01-13
Supplement: 1471-2180-9-8-S5.pdf [file 1471-2180-9-8-S5.pdf]

**Additional file 5 – Sequence analysis of putative integrase genes from *P. fluorescens* Pf-5**

| CDS                   | Gene name   | Position             | Protein length (residues) | Protein mol weight (kDa) | Putative ribosome binding site | Closest protein of phage or pyocin origin (accession no.), blastp E-value <sup>a</sup> | Other similar proteins (accession no.), blastp E-value <sup>a</sup>                                      | Predicted function (functional domains)                                 |
|-----------------------|-------------|----------------------|---------------------------|--------------------------|--------------------------------|----------------------------------------------------------------------------------------|----------------------------------------------------------------------------------------------------------|-------------------------------------------------------------------------|
| PFL_1101              | <i>xerD</i> | 1256663..1257559     | 298                       | 33.856                   | GAGT                           | None detected                                                                          | site-specific recombinase XerD from <i>Pseudomonas fluorescens</i> Pf0-1 (ABA72768), 8e-162              | Integrase/recombinase XerD (COG4973)                                    |
| PFL_1843 <sup>c</sup> | <i>int1</i> | 2044797..2045261(-)  | 154                       | 17.618                   | GGAGG                          | Phage integrase from <i>Pseudomonas aeruginosa</i> phage phiCTX (NP_490644); 1e-115    | Putative transposase IntR from putative <i>E.coli</i> lambdoid prophage Rac (P76056); 1e-31              | Defective phage integrase associated with prophage 02 (COGs 4974, 0582) |
| PFL_1976              | <i>int2</i> | 2207060..2208202     | 380                       | 43.927                   | GTAG                           | Shufflon-specific recombinase from plasmid Collb-P9 (AAZ05392), 4e-21                  | Phage integrase family protein PputGB1_1711 from <i>Pseudomonas putida</i> GB-1 (YP_001667950), 0.0      | Putative phage integrase associated with prophage 03                    |
| int3 <sup>b</sup>     | <i>int3</i> | 2338455..2339156 (-) | 233                       | 26.312                   | GTGG                           | Phage integrase from <i>Shigella flexneri</i> phage SfX (AAD10295); 2e-06              | Putative integrase PputGB1_3473 from <i>Pseudomonas putida</i> GB-1 (ABY99364), 8e <sup>-99</sup>        | P22-like phage integrase associated with prophage 04                    |
| PFL_3009              | <i>int4</i> | 3461943..3463166     | 407                       | 46.340                   | GTGA                           | Putative prophage integrase PSPPH_2793 from <i>Pseudomonas syringae</i> pv.            | Putative site-specific recombinase from <i>Magnetospirillum gryphiswaldense</i> MSR-1 (CAM76684), 1e-114 | Putative phage integrase (COG4974)                                      |

|          |                               |                      |     |        |       |                                                                                                       |                                                                                                          |                                                                        |
|----------|-------------------------------|----------------------|-----|--------|-------|-------------------------------------------------------------------------------------------------------|----------------------------------------------------------------------------------------------------------|------------------------------------------------------------------------|
| PFL_3010 | <i>int5</i>                   | 3463166..3464710     | 514 | 57.496 | GGATG | phaseolicola<br>1448A<br>(AAZ33587), 2e-103<br>None detected                                          | Putative site-specific recombinase from <i>Magnetospirillum gryphiswaldense</i> MSR-1 (CAM76079), 5e-103 | Putative integrase (COG4974)                                           |
| PFL_3042 | <i>int6</i>                   | 3507541..3508482 (-) | 313 | 35.473 | GGAG  | Multiple genome hits                                                                                  | Putative integrase Pf01_2840 from <i>Pseudomonas fluorescens</i> Pf0-1 (ABA74581), 1e-142                | Putative phage integrase (COG4973)                                     |
| PFL_3794 | <i>int7</i>                   | 4393772..4394821     | 349 | 40.200 | GGTG  | Integrase PPF10_gp028 from <i>Pseudomonas</i> phage F10 (YP_001293372), 1e-100                        | Site-specific recombinase PSSEEN2226 from <i>Pseudomonas entomophila</i> L48 (CAK15045), 6e-163          | Putative lambda-phage integrase associated with prophage 06.           |
| PFL_4752 | <i>int8</i>                   | 5491834..5493171     | 445 | 50.922 | GAGG  | Multiple genome hits                                                                                  | Putative integrase PA2G_05424 from <i>Pseudomonas aeruginosa</i> 2192 (EAZ62001), 3e-124                 | Putative integrase associated with mobile island PFGI-1 (COG4973)      |
| PFL_4977 | <i>int9</i>                   | 5728657..5729898     | 413 | 46.144 | GGAT  | Site-specific recombinase from PAI-R1 island of <i>Pseudomonas viridiflava</i> ME3.1b (AAT96071), 0.0 | Putative site-specific recombinase from <i>Acinetobacter baumannii</i> AYE (CAM87726), 4e-80             | Putative P4-like phage integrase associated with prophage 07 (COG0582) |
| PFL_6015 | <i>xerC</i><br>( <i>sss</i> ) | 6834858..6835754     | 298 | 33.523 | GGTAC | Multiple genome hits                                                                                  | Site-specific recombinase Sss/XerC from                                                                  | Site-specific recombinase Sss/XerC (COG4973)                           |

*Pseudomonas  
fluorescens* F113  
(AA017715), 4e-150

---

<sup>a</sup> Only expectation values of  $1e^{-05}$  and below were considered as significant matches during BLAST database searches; <sup>b</sup> open reading frame(s) not present in the original genome annotation; <sup>c</sup> open reading frame contains internal frameshifts; <sup>d</sup> open reading frame has an alternative start site.
