# Supplementary material for: Mobile genetic elements in the genome of the beneficial rhizobacterium Pseudomonas fluorescens Pf-5
Source: PubMed Central journal article supplement (PMC2647930; doi:10.1186/1471-2180-9-8), 2009-01-13
Supplement: 1471-2180-9-8-S6.pdf [file 1471-2180-9-8-S6.pdf]

**Additional file 6 – Sequence analysis of prophage 02 of *P. fluorescens* Pf-5**

| CDS                                        | Gene name               | Position                             | Protein length (residues)                                                                                                                                  | Protein mol weight (kDa) | Putative ribosome binding site | Closest protein of phage or pyocin origin (accession no.), blastp E-value <sup>a</sup>                                          | Other similar proteins (accession no.), organism, blastx E-value <sup>a</sup>                | Predicted function (functional domains)           |
|--------------------------------------------|-------------------------|--------------------------------------|------------------------------------------------------------------------------------------------------------------------------------------------------------|--------------------------|--------------------------------|---------------------------------------------------------------------------------------------------------------------------------|----------------------------------------------------------------------------------------------|---------------------------------------------------|
| PFL_1842                                   | <i>attL</i><br>PFL_1842 | 2042157..2042216<br>2042784..2044547 | 610                                                                                                                                                        | 68.526                   | GGCG                           | Hypothetical protein VIBHAR_05008 from <i>Streptococcus thermophilus</i> integrative conjugative element ICES1(ABU72915); 1e-13 | Hypothetical protein VIBHAR_05008 from <i>Vibrio harveyi</i> ATCC BAA-1116 (ABU72915); 6e-78 | Putative mobile element-related protein (COG3593) |
| PFL_1843 <sup>c</sup>                      | <i>int1</i>             | 2044797..2045261(-)                  | 154                                                                                                                                                        | 17.618                   | GGAGG                          | Phage integrase from <i>Pseudomonas aeruginosa</i> phage phiCTX (NP_490644); 1e-115                                             | Putative transposase IntR from putative <i>E.coli</i> lambdoid prophage Rac (P76056); 1e-31  | Putative phage integrase (COGs 4974, 0582)        |
| PFL_1844                                   | PFL_1844                | 2046023..2046211(-)                  | 62                                                                                                                                                         | 7.084                    | None detected                  | None detected                                                                                                                   | None detected                                                                                | Hypothetical protein                              |
| PFL_1845                                   | PFL_1845                | 2046050..2047222                     | 390                                                                                                                                                        | 45.502                   | GCTGG                          | None detected                                                                                                                   | Gp5 domain protein PSPA7_5076 from <i>Pseudomonas aeruginosa</i> PA7 (ABR83565); 2e-96       | Conserved hypothetical protein                    |
| PFL_1846                                   | PFL_1846                | 2047411..2049387(-)                  | 658                                                                                                                                                        | 75.366                   | GGAAG                          | None detected                                                                                                                   | Hypothetical protein Shewmr4_0837 from <i>Shewanella</i> sp. MR-4 (ABI37917); 2e-155         | Conserved hypothetical protein (COG 3593)         |
| Alignment of <i>attL</i> and <i>attR</i> : |                         |                                      | <pre> attL  TCGAATCTCTCCTTCACCGCCACATTCTACAAACACAAACCCCTGACTTTCCTAAAGAAA       : attR  TCGAATCTCTCCTTCACCGCCACATTCTACAAACACAAACCCCTGACTTTCCTAAAGAAA </pre> |                          |                                |                                                                                                                                 |                                                                                              |                                                   |

<sup>a</sup> Only expectation values of  $1e^{-05}$  and below were considered as significant matches during BLAST database searches; <sup>c</sup> part of a longer open reading frame with internal frameshifts.
