# Supplementary material for: Mobile genetic elements in the genome of the beneficial rhizobacterium Pseudomonas fluorescens Pf-5
Source: PubMed Central journal article supplement (PMC2647930; doi:10.1186/1471-2180-9-8), 2009-01-13
Supplement: 1471-2180-9-8-S7.pdf [file 1471-2180-9-8-S7.pdf]

**Additional file 7 – Sequence analysis of prophage 04 of *P. fluorescens* Pf-5**

| CDS                   | Gene name                | Position             | Protein length (residues)                                                | Protein mol weight (kDa) | Putative ribosome binding site | Closest protein of phage or plasmid origin (accession no.), blastP E-value <sup>a</sup>                          | Other similar proteins (accession no.), blastP E-value <sup>a</sup>                                         | Predicted function (functional domains)                 |
|-----------------------|--------------------------|----------------------|--------------------------------------------------------------------------|--------------------------|--------------------------------|------------------------------------------------------------------------------------------------------------------|-------------------------------------------------------------------------------------------------------------|---------------------------------------------------------|
| PFL_2119              | tRNA-Pro ( <i>attL</i> ) | 2338296..2338372     | CGGGGCGTAGCGCAGTCCGGTAGCGCACTAGCATGGGGTGCTAGGGGTTCGAGTGTTCGAATCACTCCGTCC |                          |                                |                                                                                                                  |                                                                                                             |                                                         |
| 1 <sup>b</sup>        | <i>int3</i>              | 2338455..2339156 (-) | 233                                                                      | 26.312                   | GTGG                           | Phage integrase from <i>Shigella flexneri</i> phage SfX (AAD10295); 2e <sup>-06</sup>                            | Putative integrase PputGB1_3473 from <i>Pseudomonas putida</i> GB-1 (ABY99364), 8e <sup>-99</sup>           | Phage integrase                                         |
| 2 <sup>b</sup>        | <i>orf2</i>              | 2339231..2339893     | 220                                                                      | 24.660                   | GGCG                           | Putative replication protein SfVp39 from <i>Shigella flexneri</i> bacteriophage V (NP_599071); 4e <sup>-05</sup> | None detected                                                                                               | Putative phage related conserved protein                |
| PFL_2120              | PFL_2120                 | 2339491..2339670     | 59                                                                       | 6.438                    | GTGAA                          | None detected                                                                                                    | Hypothetical protein PFL_3776 from <i>Pseudomonas fluorescens</i> Pf-5 (AAY93041), 7e-22                    | Conserved hypothetical protein                          |
| PFL_2121              | PFL_2121                 | 2339919..2340170     | 83                                                                       | 9.154                    | GTGAG                          | Phage protein Orf84 from <i>Pseudomonas aeruginosa</i> phage D3 (NP_061580); 1e <sup>-09</sup>                   | Hypothetical protein PFL_3772 from <i>Pseudomonas fluorescens</i> Pf-5 (AAY93037), 6e-36                    | Conserved phage related protein                         |
| 3 <sup>bc</sup>       | <i>orf3</i>              | 2341690..2342074     | 77                                                                       | 8.460                    | GAGG                           | L-shaped tail fiber protein of <i>E.coli</i> bacteriophage T5 (P13390), 7e <sup>-12</sup>                        | None detected                                                                                               | Tail fiber protein                                      |
| 4 <sup>b</sup>        | <i>orf4</i>              | 2342156..2343202     | 348                                                                      | 38.797                   | AGGA                           | None detected                                                                                                    | Putative acyltransferase PTD2_11199 from <i>Pseudoalteromonas tunicata</i> D2 (EAR29378); 6e <sup>-19</sup> | Putative acyltransferase (COG1835)                      |
| PFL_2122 <sup>d</sup> | PFL_2122                 | 2342156..2344091     | 283                                                                      | 31.778                   | TAAG                           | Putative minor phage tail protein L from <i>Burkholderia pseudomallei</i> phage                                  | Hypothetical protein PFL_3749 from <i>Pseudomonas fluorescens</i> Pf-5 (AAY93014), 2e-48                    | Putative minor tail protein similar to lambda protein L |

|                 |             |                      |     |        |       |                                                                                                                                                                                |                                                                                                                                                       |                                                         |
|-----------------|-------------|----------------------|-----|--------|-------|--------------------------------------------------------------------------------------------------------------------------------------------------------------------------------|-------------------------------------------------------------------------------------------------------------------------------------------------------|---------------------------------------------------------|
| PFL_2123        | PFL_2123    | 2344115..2344513     | 132 | 15.082 | CAAG  | phi1026b (NP_945047);<br>5e <sup>-29</sup><br>Tail component protein<br>gp19 of <i>Burkholderia</i><br><i>thailandensis</i> phage<br>phiE125 (NP_536375),<br>5e <sup>-19</sup> | Hypothetical protein<br>PFL_3749 from<br><i>Pseudomonas fluorescens</i><br>Pf-5 (AAY93014), 4e-57                                                     | (COG4672)<br>Conserved phage<br>related protein         |
| 5 <sup>b</sup>  | <i>orf5</i> | 2344589..2345038     | 149 | 16.397 | AGGAA | None detected                                                                                                                                                                  | None detected                                                                                                                                         | Hypothetical<br>protein                                 |
| 6 <sup>b</sup>  | <i>orf6</i> | 2345493..2346008     | 171 | 18.287 | GGGCG | Putative protein gp80<br>from <i>Burkholderia</i> phage<br>Bcep22 (AAQ55012); 6e-<br>06                                                                                        | Hypothetical protein<br>PFL_2019 from<br><i>Pseudomonas fluorescens</i><br>Pf-5 (AAY91305), 3e-31                                                     | Putative phage<br>protein                               |
| 7 <sup>b</sup>  | <i>orf7</i> | 2346162..2346701 (-) | 179 | 18.591 | GAGG  | None detected                                                                                                                                                                  | Conserved hypothetical<br>protein XCC3128 from<br><i>Xanthomonas campestris</i><br>pv. <i>campestris</i> ATCC<br>33913 (NP_638475), 1e <sup>-26</sup> | Conserved<br>hypothetical<br>protein                    |
| PFL_2124        | PFL_2124    | 2347171..2347848 (-) | 225 | 25.124 | AGGGG | None detected                                                                                                                                                                  | Hypothetical protein<br>PFL_3740 from<br><i>Pseudomonas fluorescens</i><br>Pf-5 (AAY93005), 5e-108                                                    | Conserved<br>hypothetical<br>protein<br>(COG2135)       |
| 8 <sup>b</sup>  | <i>orf8</i> | 2347920..2348480 (-) | 186 | 21.430 | GAGG  | None detected                                                                                                                                                                  | Putative ATP-dependent<br>DNA ligase PflO1_2097<br>from <i>Pseudomonas</i><br><i>fluorescens</i> PfO-1<br>(ABA73840); 3e <sup>-61</sup>               | Putative ATP-<br>dependent DNA<br>ligase                |
| 9 <sup>bc</sup> | <i>orf9</i> | 2348722..2348895     | 57  | 6.244  | na    | None detected                                                                                                                                                                  | Hypothetical protein<br>PFL_2878 from<br><i>Pseudomonas fluorescens</i><br>Pf-5 (AAY92150), 4e-06                                                     | Putative cell wall<br>glycosyltransfera<br>se (COG0463) |
| PFL_2125        | PFL_2125    | 2349053..2349262 (-) | 69  | 7.647  | GAGG  | None detected                                                                                                                                                                  | Hypothetical protein                                                                                                                                  | Hypothetical<br>protein                                 |
| PFL_2126        | PFL_2126    | 2349714..2350442 (-) | 242 | 27.075 | CTGG  | Pyocin regulator PrtR<br>from <i>Pseudomonas</i><br><i>aeruginosa</i> (Q06553); 3e <sup>-</sup><br>50                                                                          | Hypothetical protein<br>PFL_3780 from<br><i>Pseudomonas fluorescens</i><br>Pf-5 (AAY93045), 3e-80                                                     | Cro/C1-type<br>repressor protein<br>(COG2932)           |

|                 |              |                  |     |        |       |               |                                                                                          |                                |
|-----------------|--------------|------------------|-----|--------|-------|---------------|------------------------------------------------------------------------------------------|--------------------------------|
| 10 <sup>b</sup> | <i>orf10</i> | 2350540..2350722 | 60  | 6.480  | GGCAG | None detected | Hypothetical protein PFL_3780 from <i>Pseudomonas fluorescens</i> Pf-5 (AAY93045), 3e-80 | Conserved hypothetical protein |
| PFL_2127        | <i>llpA1</i> | 2350955..2351797 | 280 | 31.104 | AGGT  | None detected | Putidacin PFL_1229 from <i>Pseudomonas fluorescens</i> Pf-5 (AAY90516), 2e-155           | Bacteriocin putidacin L1       |

<sup>a</sup> Only expectation values of  $1e^{-05}$  and below were considered as significant matches during BLAST database searches; <sup>b</sup> open reading frame(s) not present in the original genome annotation; <sup>c</sup> part of a longer open reading frame with internal frameshifts; <sup>d</sup> open reading frame has an alternative start site.
