# Supplementary material for: Mobile genetic elements in the genome of the beneficial rhizobacterium Pseudomonas fluorescens Pf-5
Source: PubMed Central journal article supplement (PMC2647930; doi:10.1186/1471-2180-9-8), 2009-01-13
Supplement: 1471-2180-9-8-S9.pdf [file 1471-2180-9-8-S9.pdf]

**Additional file 9 – Sequence analysis of island 01 of *P. fluorescens* Pf-5**

| CDS                                         | Gene name                     | Position                                      | Protein length (residues) | Protein mol weight (kDa) | Putative ribosome binding site | Closest protein of phage or pyocin origin (accession no.), blastp E-value <sup>a</sup>                                     | Other similar proteins (accession no.), blastp E-value <sup>a</sup>                                                                     | Predicted function (functional domains)             |
|---------------------------------------------|-------------------------------|-----------------------------------------------|---------------------------|--------------------------|--------------------------------|----------------------------------------------------------------------------------------------------------------------------|-----------------------------------------------------------------------------------------------------------------------------------------|-----------------------------------------------------|
| PFL_4658<br>(pseudo-tRNA)<br>1 <sup>b</sup> | <i>attL</i><br><br><i>soj</i> | 5378468..5378541 (-)<br><br>5378616.. 5379488 | <br><br>290               | <br><br>31.681           | <br><br>GAGG                   | <br><br>Putative Soj protein from <i>Pseudomonas syringae</i> pv. <i>phaseolicola</i> 1302A (CAI36042), 3e <sup>-105</sup> | <br><br>Chromosome partitioning related protein PA14_58910 from <i>Pseudomonas aeruginosa</i> UCBPP-PA14 (ABJ13810), 6e <sup>-105</sup> | <br><br>Partitioning protein (COGs1192, 0455, 0489) |
| PFL_4659                                    | PFL_4659                      | 5379490..5380242                              | 250                       | 28.156                   | GGAAG                          | None detected                                                                                                              | Hypothetical protein Psyr_1533 from <i>Pseudomonas syringae</i> pv. <i>syringae</i> B728a (AAY36583), 7e <sup>-68</sup>                 | Conserved hypothetical protein                      |
| PFL_4660                                    | PFL_4660                      | 5380239..5380622                              | 127                       | 14.148                   | GGTG                           | None detected                                                                                                              | Hypothetical protein CtesDRAFT_3559 from <i>Comamonas testosteroni</i> KF-1 (EAV12559), 2e <sup>-11</sup>                               | Conserved hypothetical protein                      |
| 2 <sup>b</sup>                              | <i>orf2</i>                   | 5380619..5380903                              | 94                        | 10.016                   | GGAGG                          | None detected                                                                                                              | None detected                                                                                                                           | Hypothetical protein                                |
| 3 <sup>b</sup>                              | <i>orf3</i>                   | 5380900..5381181                              | 93                        | 10.185                   | GGAG                           | None detected                                                                                                              | Hypothetical protein Pput_4138 from <i>Pseudomonas putida</i> F1 (ABQ80262), 5e <sup>-24</sup>                                          | Conserved hypothetical protein                      |
| PFL_4661                                    | PFL_4661                      | 538118..5381870                               | 229                       | 25.435                   | GGAGG                          | None detected                                                                                                              | Hypothetical protein PA14_58960 from <i>Pseudomonas aeruginosa</i> UCBPP-PA14 (ABJ13815), 4e <sup>-65</sup>                             | Conserved hypothetical protein                      |

|                       |             |                  |     |        |       |                                                                |                                                                                                         |                                                |
|-----------------------|-------------|------------------|-----|--------|-------|----------------------------------------------------------------|---------------------------------------------------------------------------------------------------------|------------------------------------------------|
| PFL_4662              | PFL_4662    | 5381933..5382538 | 201 | 22.857 | GAGG  | Gp46 from <i>Burkholderia</i> phage phi1026b (AAR23197), 2e-13 | Hypothetical protein RSc1656 from <i>Ralstonia solanacearum</i> GMI1000 (CAD15358), 1e-15               | Conserved hypothetical protein                 |
| PFL_4663              | <i>dnaB</i> | 5382535..5383884 | 449 | 49.306 | GGAGG | None detected                                                  | Putative replicative DNA helicase from <i>Pseudomonas aeruginosa</i> (ABR13456), 2e-173                 | Putative replicative DNA helicase (COG0305)    |
| 4 <sup>b</sup>        | <i>orf4</i> | 5383881..5384069 | 62  | 7.266  | GGAGG | None detected                                                  | Hypothetical protein from <i>Pseudomonas aeruginosa</i> (ABR13455), 4e-05                               | Conserved hypothetical protein                 |
| PFL_4664              | PFL_4664    | 5384059..5384577 | 172 | 19.060 | GGAGG | None detected                                                  | Hypothetical protein PA2G_05504 from <i>Pseudomonas aeruginosa</i> 2192 (EAZ62078), 4e-41               | Conserved hypothetical protein                 |
| 5 <sup>b</sup>        | <i>orf5</i> | 5384570..5384800 | 76  | 8.613  | AGGA  | None detected                                                  | Hypothetical protein XCV2294 from <i>Xanthomonas campestris pv. vesicatoria</i> 85-10 (CAJ23971), 2e-10 | Conserved hypothetical protein                 |
| PFL_4665 <sup>d</sup> | PFL_4665    | 5384800..5385801 | 333 | 37.513 | AGGA  | None detected                                                  | Nucleoid-associated protein NdpA from <i>Pseudomonas fluorescens</i> Pf0-1 (ABA72726), 1e-172           | Putative nucleoid-associated protein (COG3081) |
| 6 <sup>b</sup>        | <i>orf6</i> | 5385819..5386145 | 108 | 12.022 | GGAG  | None detected                                                  | Arc domain-containing protein Pput_1445 from <i>Pseudomonas putida</i> F1 (ABQ77603), 1e-11             | Conserved hypothetical protein                 |
| PFL_4666              | PFL_4666    | 5386147..5387820 | 557 | 61.608 | GGTG  | None detected                                                  | Hypothetical protein from <i>Pseudomonas</i>                                                            | Conserved hypothetical                         |

|                |             |                  |     |        |       |               |                                                                                                                        |                                                        |
|----------------|-------------|------------------|-----|--------|-------|---------------|------------------------------------------------------------------------------------------------------------------------|--------------------------------------------------------|
| PFL_4667       | PFL_4667    | 5387862..5388488 | 208 | 23.632 | GGAGG | None detected | <i>aeruginosa</i> (AAP22516), 1e-179<br>Hypothetical protein from <i>Pseudomonas aeruginosa</i> 2129 (ABR13446), 1e-53 | protein<br>Conserved hypothetical protein              |
| PFL_4668       | PFL_4668    | 5388485..5389765 | 426 | 46.771 | GGCG  | None detected | Hypothetical protein PA14_59100 from <i>Pseudomonas aeruginosa</i> UCBPP-PA14 (ABJ13827), 3e-130                       | Conserved hypothetical protein                         |
| PFL_4669       | PFL_4669    | 5390321..5391052 | 243 | 27.346 | AGGA  | None detected | Hypothetical protein PA14_59130 from <i>Pseudomonas aeruginosa</i> UCBPP-PA14 (ABJ13830), 7e-89                        | Conserved hypothetical protein                         |
| PFL_4670       | PFL_4670    | 5391049..5391594 | 181 | 19.825 | GGTG  | None detected | Hypothetical protein PACG_04945 from <i>Pseudomonas aeruginosa</i> C3719 (ABR13439), 7e-62                             | Conserved hypothetical protein                         |
| PFL_4671       | PFL_4671    | 5391609..5392115 | 168 | 18.863 | GGAG  | None detected | Putative ssb protein PACG_04944 from <i>Pseudomonas aeruginosa</i> C3719 (ABR13439), 3e-56                             | Putative single-stranded DNA binding protein (COG0629) |
| 7 <sup>b</sup> | <i>orf7</i> | 5392794..5392991 | 65  | 7.240  | GAGG  | None detected | Hypothetical protein PA14_59160 from <i>Pseudomonas aeruginosa</i> UCBPP-PA14 (ABJ13833), 7e-89                        | Conserved hypothetical protein                         |
| PFL_4672       | <i>topA</i> | 5393086..5395002 | 638 | 71.255 | GGAC  | None detected | Putative topoisomerase I PA2G_05490 from <i>Pseudomonas</i>                                                            | Putative topoisomerase IA (COG0550)                    |

|                       |             |                  |     |        |        |                                                                                                |                                                                                                                                            |                                                           |
|-----------------------|-------------|------------------|-----|--------|--------|------------------------------------------------------------------------------------------------|--------------------------------------------------------------------------------------------------------------------------------------------|-----------------------------------------------------------|
| PFL_4673              | PFL_4673    | 5395092..5396972 | 626 | 70.597 | GGAG   | None detected                                                                                  | <i>aeruginosa</i> 2192 (EAZ62064), 0.0<br>Hypothetical protein PA14_59200 from <i>Pseudomonas aeruginosa</i> UCBPP-PA14 (ABJ13837), 1e-124 | Conserved hypothetical protein                            |
| PFL_4674 <sup>d</sup> | PFL_4674    | 5396969..5398936 | 655 | 73.493 | GGTG   | None detected                                                                                  | Hypothetical protein PA2G_05487 from <i>Pseudomonas aeruginosa</i> 2192 (EAZ62061), 0.0                                                    | Conserved hypothetical protein                            |
| PFL_4675              | <i>pilL</i> | 5399717..5400862 | 381 | 40.331 | AAAGG  | PilL protein from plasmid Collb-P9 (ZP_02795682), 4e-09                                        | Type IV pilus protein PSPA7_4470 from <i>Pseudomonas aeruginosa</i> PA7 (ABR86409), 2e-103                                                 | Putative pilus biogenesis protein                         |
| PFL_4676              | <i>pilN</i> | 5400859..5402700 | 613 | 64.269 | GAGAGA | Putative pilus formation outer membrane protein from plasmid Collb-P9 (ZP_02783381), 7e-58     | Type IV B pilus protein from <i>Pseudomonas syringae</i> pv. <i>syringae</i> B728a (AAY36567), 6e-168                                      | Putative pilus biogenesis protein of secretin superfamily |
| PFL_4677              | <i>pilO</i> | 5402711..5404045 | 444 | 48.788 | AAGGG  | Hypothetical protein R64_p127 from <i>Salmonella typhimurium</i> plasmid R64 (BAA77975), 6e-10 | Type IV B pilus protein from <i>Pseudomonas syringae</i> pv. <i>phaseolicola</i> (CAI36060), 3e-108                                        | Putative pilin accessory protein                          |
| 8 <sup>b</sup>        | <i>pilP</i> | 5404035..5404565 | 176 | 18.384 | GGAG   | Pilus biogenesis protein from plasmid Collb-P9 (NP_052544), 5e-07                              | Hypothetical protein from <i>Pseudomonas syringae</i> pv. <i>syringae</i> B728a (AAY36565), 8e-28                                          | Putative pilus biogenesis protein                         |
| PFL_4678              | <i>pilQ</i> | 5404562..5406094 | 510 | 55.964 | GGAG   | Putative ATP-binding protein from plasmid Collb-P9 (NP_052543), 2e-69                          | Type IV pilus protein from <i>Pseudomonas syringae</i> pv. <i>phaseolicola</i>                                                             | Putative pilus assembly; ATPase (COG2804)                 |

|                       |              |                  |     |        |       |                                                                             |                                                                                                                          |                                                        |
|-----------------------|--------------|------------------|-----|--------|-------|-----------------------------------------------------------------------------|--------------------------------------------------------------------------------------------------------------------------|--------------------------------------------------------|
| PFL_4679              | <i>pilR</i>  | 5406087..5407253 | 388 | 43.386 | GGAG  | Putative integral membrane protein from plasmid Collb-P9 (NP_052542), 4e-43 | (CAI36062), 3e-160<br>Type IV pilus protein from <i>Pseudomonas syringae</i> pv. <i>syringae</i> B728a (AAY36563), 2e-87 | Putative type II secretory pathway component (COG1459) |
| PFL_4680              | <i>pilS</i>  | 5407275..5407790 | 171 | 17.580 | AGGTA | Putative type IV prepilin from plasmid Collb-P9 (NP_052541), 1e-06          | Type IV pilus protein from <i>Pseudomonas syringae</i> pv. <i>phaseolicola</i> (CAI36064), 6e-42                         | Putative pilus biogenesis protein                      |
| PFL_4681 <sup>d</sup> | <i>pilU</i>  | 5407796..5408752 | 313 | 34.110 | AGGA  | None detected                                                               | Type IV pilus protein from <i>Pseudomonas syringae</i> pv. <i>syringae</i> B728a (AAY36561), 4e-86                       | Putative pilus retraction ATPase (COG2805)             |
| PFL_4682              | <i>pilV</i>  | 5408742..5409953 | 403 | 42.487 | GGAG  | Putative type IV prepilin from plasmid Collb-P9 (NP_052538), 6e-42          | Putative prepilin from <i>Pseudomonas aeruginosa</i> (ABR13422), 3e-91                                                   | Putative type IV prepilin                              |
| PFL_4683              | <i>pilM</i>  | 5409968..5410408 | 146 | 15.372 | AGGT  | None detected                                                               | Hypothetical protein PACG_04929 from <i>Pseudomonas aeruginosa</i> C3719 (EAZ56207), 1e-28                               | Putative pilus biogenesis protein                      |
| 9 <sup>b</sup>        | <i>orf9</i>  | 5411299..5411640 | 113 | 12.796 | GGAG  | None detected                                                               | Hypothetical protein PACG_04927 from <i>Pseudomonas aeruginosa</i> C3719 (EAZ56206), 9e-11                               | Conserved hypothetical protein                         |
| orf10 <sup>b</sup>    | <i>orf10</i> | 5411715..5411891 | 58  | 6.147  | AGGA  | None detected                                                               | Hypothetical protein PACG_04926 from <i>Pseudomonas aeruginosa</i> C3719 (EAZ56204), 4e-11                               | Conserved hypothetical protein                         |
| 11 <sup>b</sup>       | <i>orf11</i> | 5411893..5412024 | 43  | 4.987  | GGAG  | None detected                                                               | Hypothetical protein PA14_59390 from                                                                                     | Conserved hypothetical                                 |

|                        |              |                      |     |        |       |               |  |                                                                                                 |                                |
|------------------------|--------------|----------------------|-----|--------|-------|---------------|--|-------------------------------------------------------------------------------------------------|--------------------------------|
|                        |              |                      |     |        |       |               |  | <i>Pseudomonas aeruginosa</i> UCBPP-PA14 (ABJ13853), 2e-05                                      | protein                        |
| PFL_4684               | PFL_4684     | 5412717..5413166     | 149 | 16.192 | GGAG  | None detected |  | Hypothetical protein PSPA7_4482 from <i>Pseudomonas aeruginosa</i> PA7 (ABR85815), 8e-57        | Conserved hypothetical protein |
| PFL_4685               | PFL_4685     | 5414388..5414708     | 106 | 11.840 | GGAG  | None detected |  | Hypothetical protein PA14_59470 from <i>Pseudomonas aeruginosa</i> UCBPP-PA14 (ABJ13858), 9e-22 | Conserved hypothetical protein |
| PFL_4686 <sup>cd</sup> | PFL_4686     | 5414777..5415187     | 117 | 12.790 | GGAG  | None detected |  | Hypothetical protein PflO1_3006 from <i>Pseudomonas fluorescens</i> PfO-1 (ABA74744), 2e-09     | Conserved hypothetical protein |
| PFL_4687               | PFL_4687     | 5415235..5415528 (-) | 97  | 10.714 | GGAC  | None detected |  | None detected                                                                                   | Hypothetical protein           |
| 12 <sup>b</sup>        | <i>orf12</i> | 5415250..5415855     | 201 | 22.332 | GGAG  | None detected |  | Hypothetical protein PACG_04918 from <i>Pseudomonas aeruginosa</i> C3719 (EAZ56196), 1e-59      | Conserved hypothetical protein |
| PFL_4688               | PFL_4688     | 5415949..5416203     | 84  | 9.503  | GGAG  | None detected |  | Hypothetical protein PACG_04914 from <i>Pseudomonas aeruginosa</i> C3719 (EAZ56192), 1e-24      | Hypothetical protein           |
| 13 <sup>b</sup>        | <i>orf13</i> | 5416269..5416871     | 200 | 22.953 | GGAGG | None detected |  | Hypothetical protein PaerPA_01000854 from <i>Pseudomonas aeruginosa</i> PACS2 (AAP22600), 2e-94 | Conserved hypothetical protein |

|                       |              |                  |     |        |       |                                                |                                                                                                                         |                                                           |
|-----------------------|--------------|------------------|-----|--------|-------|------------------------------------------------|-------------------------------------------------------------------------------------------------------------------------|-----------------------------------------------------------|
| PFL_4689              | PFL_4689     | 5416895..5418334 | 479 | 53.576 | AGGA  | None detected                                  | Hypothetical protein from <i>Pseudomonas aeruginosa</i> (ABR13405), 0.0                                                 | Conserved hypothetical protein                            |
| PFL_4690 <sup>d</sup> | PFL_4690     | 5418426..5420669 | 747 | 83.138 | GGAG  | None detected                                  | Putative helicase from <i>Pseudomonas aeruginosa</i> (ABR13404), 0.0                                                    | Putative helicase (COG0553)                               |
| PFL_4691 <sup>d</sup> | PFL_4691     | 5420936..5421361 | 141 | 15.326 | GGAAG | RumA from IncJ plasmid R391 (AAC45831), 1e-19  | Putative S24 and S26 domain peptidase from <i>Pseudomonas putida</i> W619 (ACA73238), 2e-44                             | Putative ultraviolet light resistance protein A (COG1974) |
| PFL_4692              | PFL_4692     | 5421354..5422625 | 423 | 47.163 | GCAG  | RumB from IncJ plasmid R391 (AAC45832), 9e-106 | RulB protein from <i>Pseudomonas syringae</i> pv. <i>phaseolicola</i> 1448A (AAZ38072), 0.0                             | Putative ultraviolet light resistance protein B (COG0389) |
| 14 <sup>b</sup>       | <i>orf14</i> | 5422735..5423430 | 231 | 24.539 | GAGG  | None detected                                  | Hypothetical protein from <i>Pseudomonas aeruginosa</i> (ABR13380), 2e-50                                               | Conserved hypothetical protein                            |
| PFL_4693              | PFL_4693     | 5423444..5424187 | 247 | 27.418 | AGGA  | None detected                                  | Conserved hypothetical protein PACG_04903 from <i>Pseudomonas aeruginosa</i> C3719 (EAZ56181), 5e-77                    | Conserved hypothetical protein                            |
| PFL_4694              | PFL_4694     | 5424172..5424723 | 183 | 19.489 | GGTG  | None detected                                  | Soluble lytic murein transglycosylase from <i>Pseudomonas syringae</i> pv. <i>phaseolicola</i> 1448A (CAI36111), 7e-162 | Conserved hypothetical protein                            |
| PFL_4695              | PFL_4695     | 5424720..5425226 | 168 | 17.681 | GGTG  | None detected                                  | Hypothetical protein from <i>Pseudomonas aeruginosa</i> (ABD94658), 5e-39                                               | Conserved hypothetical protein                            |
| PFL_4696              | PFL_4696     | 5425475..5427691 | 738 | 82.684 | GAGG  | Multiple putative                              | TraG/TraD family                                                                                                        | Conserved                                                 |

|                 |              |                  |     |        |       |                                             |                                                                                                         |                                                    |
|-----------------|--------------|------------------|-----|--------|-------|---------------------------------------------|---------------------------------------------------------------------------------------------------------|----------------------------------------------------|
|                 |              |                  |     |        |       | proteins of TraD family                     | protein from <i>Pseudomonas aeruginosa</i> PA7 (ABR83182), 0.0                                          | hypothetical protein of TraG/TraD family (COG3505) |
| PFL_4697        | PFL_4697     | 5427701..5428450 | 249 | 27.598 | GAGG  | None detected                               | Hypothetical protein from <i>Pseudomonas aeruginosa</i> (ABD94655), 1e-104                              | Conserved hypothetical protein                     |
| PFL_4698        | PFL_4698     | 5428460..5429920 | 486 | 55.455 | GAGG  | None detected                               | Conserved hypothetical protein from <i>Pseudomonas aeruginosa</i> (ABD94654), 0.0                       | Putative UvrD/Rep-like helicase (COG0210)          |
| PFL_4699        | PFL_4699     | 5429936..5430238 | 100 | 11.450 | GAGG  | None detected                               | Conserved hypothetical protein from <i>Pseudomonas aeruginosa</i> (ABD94651), 9e-21                     | Conserved hypothetical protein                     |
| PFL_4700        | PFL_4700     | 5430458..5430811 | 117 | 12.551 | AGAG  | Multiple putative proteins of RAQPRD family | Conserved hypothetical plasmid protein RAQPRD from <i>Azotobacter vinelandii</i> Av0P (EAM03877), 3e-34 | Conserved hypothetical plasmid protein             |
| PFL_4701        | PFL_4701     | 5430808..5431047 | 79  | 8.151  | GAGG  | None detected                               | Hypothetical protein AvinDRAFT_0451 from <i>Azotobacter vinelandii</i> Av0P (EAM03878), 7e-19           | Conserved hypothetical protein                     |
| PFL_4702        | PFL_4702     | 5431062..5431400 | 112 | 11.728 | GGAG  | None detected                               | Hypothetical protein AvinDRAFT_0452 from <i>Azotobacter vinelandii</i> Av0P (EAM03879), 5e-31           | Conserved hypothetical protein                     |
| 15 <sup>b</sup> | <i>orf15</i> | 5431416..5431784 | 122 | 13.318 | GAGCG | None detected                               | Hypothetical protein CP76 from                                                                          | Conserved hypothetical                             |



|                 |              |                  |     |         |      |               |                                                                                                             |                                                              |
|-----------------|--------------|------------------|-----|---------|------|---------------|-------------------------------------------------------------------------------------------------------------|--------------------------------------------------------------|
| PFL_4703        | PFL_4703     | 5431796..5432440 | 214 | 24.357  | AGGA | None detected | <i>Pseudomonas aeruginosa</i> (AAP22568), 3e-29                                                             | protein                                                      |
|                 |              |                  |     |         |      |               | Hypothetical protein AvinDRAFT_0452 from <i>Azotobacter vinelandii</i> Av0P (EAM03879), 5e-31               | Conserved hypothetical protein                               |
| PFL_4704        | PFL_4704     | 5432437..5433348 | 303 | 32.667  | GGAG | None detected | Hypothetical protein AvinDRAFT_0455 from <i>Azotobacter vinelandii</i> Av0P (EAM03882), 3e-92               | Conserved hypothetical protein                               |
| PFL_4705        | PFL_4705     | 5433332..5434828 | 498 | 52.765  | GGTG | None detected | Hypothetical protein PACG_04889 from <i>Pseudomonas aeruginosa</i> C3719 (EAZ56167), 0.0                    | Conserved hypothetical protein (COG0711)                     |
| 16 <sup>b</sup> | <i>orf16</i> | 5434806..5435243 | 145 | 16.157  | GGAG | None detected | Hypothetical protein PSPTO_0860 from <i>Pseudomonas syringae</i> pv. <i>tomato</i> DC3000 (AA054395), 7e-51 | Conserved hypothetical protein                               |
| PFL_4706        | PFL_4706     | 5435245..5438169 | 974 | 109.863 | GAGG | None detected | Conserved hypothetical protein from <i>Pseudomonas aeruginosa</i> C3719 (EAZ56165), 0.0                     | Putative type IV secretory pathway component VirB4 (COG3451) |
| PFL_4707        | PFL_4707     | 5438166..5438471 | 101 | 11.254  | GGAG | None detected | Hypothetical protein AvinDRAFT_0459 from <i>Azotobacter vinelandii</i> Av0P (EAM03886), 2e-25               | Conserved hypothetical protein                               |
| PFL_4708        | PFL_4708     | 5438468..5439127 | 210 | 23.759  | GAGG | None detected | Putative DsbA oxidoreductase from <i>Azotobacter vinelandii</i>                                             | Putative protein disulfide                                   |

|                       |              |                  |     |        |      |               |                                                                                                                   |                                                                           |
|-----------------------|--------------|------------------|-----|--------|------|---------------|-------------------------------------------------------------------------------------------------------------------|---------------------------------------------------------------------------|
| 17 <sup>b</sup>       | <i>orf17</i> | 5439350..5439766 | 138 | 15.763 | GAGG | None detected | Av0P (EAM03887), 5e-47<br>Hypothetical protein PputGB1_2994 from <i>Pseudomonas putida</i> GB-1 (ABY98886), 1e-40 | isomerase (COG1651)<br>Putative small integral membrane protein (COG5478) |
| 18 <sup>bc</sup>      | <i>orf18</i> | 5440033..5440371 | 111 | 12.702 | GAGG | None detected | Hemerythrin HHE cation binding region from <i>Pseudomonas fluorescens</i> Pf0-1 (ABA74147), 1e-25                 | Conserved hypothetical protein                                            |
| 19 <sup>b</sup>       | <i>orf19</i> | 5440843..5441109 | 88  | 10.278 | GGAG | None detected | Hypothetical protein PputW619_2640 from <i>Pseudomonas putida</i> W619 (ACA73132), 2e-25                          | Conserved hypothetical protein                                            |
| PFL_4709              | PFL_4709     | 5441688..5442116 | 142 | 15.271 | GGTG | None detected | Conserved hypothetical protein PA2G_05432 from <i>Pseudomonas aeruginosa</i> 2192 (EAZ62008), 3e-29               | Conserved hypothetical protein                                            |
| PFL_4710              | PFL_4710     | 5442113..5443051 | 312 | 33.486 | GAGG | None detected | Hypothetical protein DUF1527 from <i>Azotobacter vinelandii</i> Av0P (EAM03889), 1e-128                           | Conserved hypothetical protein                                            |
| PFL_4711 <sup>d</sup> | PFL_4711     | 5443072..5444424 | 450 | 47.604 | GGCG | None detected | Conserved hypothetical protein from <i>Azotobacter vinelandii</i> Av0P (EAM03890), 0.0                            | Conserved hypothetical protein                                            |
| 20 <sup>b</sup>       | <i>orf20</i> | 5444428..5444787 | 119 | 13.561 | GGAG | None detected | Conserved hypothetical protein from <i>Azotobacter vinelandii</i> Av0P (EAM03891), 5e-17                          | Conserved hypothetical protein                                            |
| PFL_4712              | PFL_4712     | 5444784..5446316 | 510 | 55.594 | GGAG | None detected | Hypothetical protein                                                                                              | Conserved                                                                 |

|                 |              |                      |     |        |         |               |                                                                                                 |                                                                                 |
|-----------------|--------------|----------------------|-----|--------|---------|---------------|-------------------------------------------------------------------------------------------------|---------------------------------------------------------------------------------|
| 21 <sup>b</sup> | <i>orf21</i> | 5446359..5446733 (-) | 124 | 13.829 | GAGA    | None detected | PaerPA_01000825 from <i>Pseudomonas aeruginosa</i> PACS2 (AAP22582), 0.0                        | hypothetical protein                                                            |
| PFL_4713        | PFL_4713     | 5446848..5447126     | 92  | 10.237 | AGGA    | None detected | Hypothetical protein from <i>Pseudomonas aeruginosa</i> (ABR13353), 3e-08                       | Conserved hypothetical protein                                                  |
| 22 <sup>b</sup> | <i>orf22</i> | 5447123..5447488     | 121 | 14.139 | AAGCGAA | None detected | Hypothetical protein PSEEN3279 from <i>Pseudomonas entomophila</i> L48 (CAK16034), 4e-33        | Putative transcriptional regulator (COG3609)                                    |
| 23 <sup>b</sup> | <i>orf23</i> | 5448221..5448397 (-) | 58  | 6.828  | GGAGG   | None detected | Hypothetical protein PSEEN3278 from <i>Pseudomonas entomophila</i> L48 (CAK16033), 2e-32        | Putative plasmid stabilization protein ParE                                     |
| PFL_4714        | PFL_4714     | 5449040..5449906     | 288 | 32.248 | GGAGG   | None detected | Conserved hypothetical protein from <i>Stenotrophomonas maltophilia</i> K279a (CAQ46011), 3e-10 | Conserved hypothetical protein                                                  |
| PFL_4715        | PFL_4715     | 5449980..5451563 (-) | 527 | 58.210 | AAGGG   | None detected | Putative hydrolase from <i>Agrobacterium tumefaciens</i> str. C58 (AAK90870), 6e-123            | Putative MhpC-like hydrolase (COG0596)                                          |
| PFL_4716        | PFL_4716     | 5452173..5452583     | 136 | 14.854 | AAGGA   | None detected | Putative diguanylate cyclase from <i>Serratia proteamaculans</i> 568 (ABV42169), 1e-119         | Putative response regulator with CheY-like receiver and GGDEF domains (COG3706) |
|                 |              |                      |     |        |         |               | Putative response regulator receiver                                                            | Putative multi-sensor hybrid                                                    |

|                 |              |                      |     |        |        |               |                                                                                                             |                                                    |
|-----------------|--------------|----------------------|-----|--------|--------|---------------|-------------------------------------------------------------------------------------------------------------|----------------------------------------------------|
| 24 <sup>b</sup> | <i>orf24</i> | 5452684..5452923 (-) | 79  | 9.543  | GGAAG  | None detected | protein from <i>Pseudomonas putida</i> GB-1 (ABV42169), 1e-119                                              | histidine kinase (COG2204)                         |
| 25 <sup>b</sup> | <i>orf25</i> | 5453369..5453590 (-) | 73  | 7.842  | GGAGG  | None detected | Hypothetical protein Pfl01_2790 from <i>Pseudomonas fluorescens</i> Pf0-1 (ABA74531), 5e-17                 | Conserved hypothetical protein                     |
| PFL_4717        | PFL_4717     | 5453713..5454210 (-) | 165 | 17.874 | AAGGAA | None detected | Hypothetical protein PP_3971 from <i>Pseudomonas putida</i> KT2440 (AAN69565), 3e-15                        | Conserved hypothetical protein                     |
| PFL_4718        | PFL_4718     | 5454348..5455277 (-) | 309 | 31.963 | GGAGG  | None detected | Hypothetical protein Psyr_5097 from <i>Pseudomonas syringae</i> pv. <i>syringae</i> B728a (AAY40124), 9e-69 | Conserved hypothetical protein (COG3685)           |
| PFL_4719        | PFL_4719     | 5455506..5456390 (-) | 294 | 31.556 | GGAG   | None detected | Putative zinc transporter protein from <i>Pseudomonas fluorescens</i> Pf0-1 (ABA74528), 4e-131              | Putative zinc transporter family protein (COG0428) |
| PFL_4720        | PFL_4720     | 5456952..5457452     | 166 | 17.728 | GAGTA  | None detected | Putative manganese containing catalase from <i>Pseudomonas fluorescens</i> Pf0-1 (ABA74529), 4e-158         | Mn-containing catalase (COG3546)                   |
| 26 <sup>b</sup> | <i>orf26</i> | 5457455..5457976     | 173 | 19.446 | GAGG   | None detected | CinA-like domain protein from <i>Pseudomonas fluorescens</i> Pf0-1 (ABA74530), 2e-65                        | CinA domain protein (COG1546)                      |
|                 |              |                      |     |        |        |               | Hypothetical protein PputGB1_3004 from <i>Pseudomonas putida</i>                                            | Conserved hypothetical protein                     |

|                       |              |                      |     |        |        |               |                                                                                                                                                     |                                                                                        |
|-----------------------|--------------|----------------------|-----|--------|--------|---------------|-----------------------------------------------------------------------------------------------------------------------------------------------------|----------------------------------------------------------------------------------------|
| PFL_4721              | PFL_4721     | 5457984..5458430     | 148 | 16.341 | GGTG   | None detected | GB-1 (ABY98896), 1e-33<br>Hypothetical protein PputGB1_3005 from <i>Pseudomonas putida</i>                                                          | Putative membrane protein (COG2323)                                                    |
| PFL_4722              | PFL_4722     | 5458655..5459881 (-) | 408 | 43.462 | GAGG   | None detected | GB-1 (ABY98897), 1e-54<br>Putative zinc-containing alcohol dehydrogenase from <i>Pseudomonas syringae</i> pv. <i>syringae</i> B728a (AAY38559), 0.0 | Putative glutathione-dependent formaldehyde dehydrogenase (COG1063)                    |
| PFL_4723 <sup>c</sup> | PFL_4723     | 5460380..5461593 (-) | 404 | 44.057 | AGGAA  | None detected | Putative zinc-containing alcohol dehydrogenase from <i>Pseudomonas syringae</i> pv. <i>syringae</i> B728a (AAY38559), 0.0                           | Putative glutathione-dependent formaldehyde dehydrogenase (COGs1063, 1062, 1064, 0604) |
| 27 <sup>b</sup>       | <i>orf27</i> | 5461702..5461923 (-) | 73  | 7.911  | GAGG   | None detected | Hypothetical protein Pput_2428 from <i>Pseudomonas putida</i> F1 (ABQ78566), 1e-16                                                                  | Conserved hypothetical protein                                                         |
| PFL_4724 <sup>d</sup> | PFL_4724     | 5462117..5462374     | 85  | 9.771  | GAGAG  | None detected | Hypothetical protein PSPA7_1221 from <i>Pseudomonas aeruginosa</i> PA7 (ABR81173), 2e-21                                                            | Conserved hypothetical protein                                                         |
| PFL_4725              | PFL_4725     | 5462417..5463505 (-) | 362 | 38.301 | AAGGAA | None detected | Hypothetical peptidase M42 protein PputGB1_2999 from <i>Pseudomonas putida</i> GB-1 (ABY98891), 1e-124                                              | Putative glutamyl amino peptidase (COG1363)                                            |

|          |             |                      |     |        |       |               |                                                                                                          |                                                                |
|----------|-------------|----------------------|-----|--------|-------|---------------|----------------------------------------------------------------------------------------------------------|----------------------------------------------------------------|
| PFL_4726 | PFL_4726    | 5463522..5464685 (-) | 387 | 43.068 | GAGG  | None detected | Putative carboxylate-amine ligase from <i>Pseudomonas entomophila</i> L48 (CAK15852), 2e-81              | Putative glutamate-cysteine ligase of 2(GCS2) family (COG2170) |
| PFL_4727 | PFL_4727    | 5464698..5465678 (-) | 326 | 35.892 | GGAG  | None detected | Putative methyl transferase from <i>Pseudomonas fluorescens</i> Pf0-1 (ABA73839), 8e-105                 | Putative methylase of HemK family (COG2890)                    |
| PFL_4728 | PFL_4728    | 5465694..5467064 (-) | 456 | 51.620 | GGAG  | None detected | Hypothetical protein from <i>Pseudomonas fluorescens</i> Pf0-1 (ABA73838), 1e-147                        | Conserved hypothetical protein                                 |
| PFL_4729 | PFL_4729    | 5467276..5467890     | 204 | 22.699 | GGAGG | None detected | Hypothetical protein Pput_2361 from <i>Pseudomonas putida</i> F1 (ABQ78500), 1e-62                       | Conserved hypothetical protein                                 |
| PFL_4730 | PFL_4730    | 5467980..5468483     | 167 | 18.310 | GGAG  | None detected | Hypothetical protein PP_3241 from <i>Pseudomonas putida</i> KT2440 (AE016517), 6e-45                     | Putative outer membrane protein (COG3652)                      |
| PFL_4731 | PFL_4731    | 5468575..5468952     | 125 | 14.628 | GGAG  | None detected | Putative NUDIX hydrolase Pput_2492 from <i>Pseudomonas putida</i> F1 (ABQ78627), 8e-24                   | Putative hydrolase of NUDIX family (COG1051)                   |
| PFL_4732 | <i>cyoD</i> | 5469413..5469751 (-) | 112 | 12.422 | GGAG  | None detected | Putative cytochrome o ubiquinol oxidase subunit IV from <i>Pseudomonas putida</i> W619 (ACA74853), 3e-28 | Putative cytochrome o ubiquinol oxidase, subunit IV (COG3125)  |
| PFL_4733 | <i>cyoC</i> | 5469753..5470367 (-) | 204 | 22.525 | GGAG  | None detected | Putative cytochrome o ubiquinol oxidase                                                                  | Putative cytochrome o                                          |

|                 |              |                      |     |        |               |               |                                                                                                                                                                                  |                                                                                                          |
|-----------------|--------------|----------------------|-----|--------|---------------|---------------|----------------------------------------------------------------------------------------------------------------------------------------------------------------------------------|----------------------------------------------------------------------------------------------------------|
| PFL_4734        | <i>cyoB</i>  | 5470370..5472343 (-) | 657 | 73.387 | GGAG          | None detected | subunit III from <i>Salmonella enterica</i> subsp. <i>arizonae</i> (ABX22352), 1e-74<br>Putative cytochrome-c oxidase from <i>Methylobacillus flagellatus</i> KT (ABE49562), 0.0 | ubiquinol oxidase, subunit III (COG1845)<br>Putative cytochrome o ubiquinol oxidase, subunit I (COG0843) |
| PFL_4735        | <i>cyoA</i>  | 5472333..5473244 (-) | 303 | 33.283 | GGAAA         | None detected | Putative ubiquinol oxidase subunit II from <i>Ralstonia pickettii</i> 12J (ACD28285), 6e-90                                                                                      | Putative cytochrome o ubiquinol oxidase, subunit II (COG1622)                                            |
| 28 <sup>b</sup> | <i>orf28</i> | 5473446..5473655 (-) | 69  | 7.364  | GAGG          | None detected | Putative metallothionein from <i>Pseudomonas putida</i> KT2440 (AE016519), 4e-06                                                                                                 | Putative metallothionein protein                                                                         |
| PFL_4736        | PFL_4736     | 5474257..5474814     | 185 | 20.374 | None detected | None detected | None detected                                                                                                                                                                    | Hypothetical protein                                                                                     |
| PFL_4737        | PFL_4737     | 5475300..5476157     | 285 | 30.055 | GGAGG         | None detected | Putative short-chain dehydrogenase/reductase from <i>Pseudomonas fluorescens</i> Pf0-1 (ABA74436), 1e-132                                                                        | Putative short chain dehydrogenase/reductase (COG1028)                                                   |
| PFL_4738        | PFL_4738     | 5476352..5476867 (-) | 171 | 19.338 | CAGAC         | None detected | Conserved hypothetical protein Pfl101_2692 from <i>Pseudomonas fluorescens</i> Pf0-1 (ABA74433), 6e-56                                                                           | Conserved hypothetical protein                                                                           |
| PFL_4739        | PFL_4739     | 5477036..5477593     | 185 | 20.674 | GGAG          | None detected | Conserved hypothetical protein from <i>Azotobacter vinelandii</i>                                                                                                                | Putative clp protease (COG0740)                                                                          |

|          |          |                      |     |        |               |               |                                                                                                                                       |                                                                                     |
|----------|----------|----------------------|-----|--------|---------------|---------------|---------------------------------------------------------------------------------------------------------------------------------------|-------------------------------------------------------------------------------------|
| PFL_4740 | PFL_4740 | 5477696..5478376     | 226 | 24.414 | GGAG          | None detected | AvOP (EAM08567),<br>6e-37<br>Alginate lyase<br>superfamily protein<br>from <i>Pseudomonas<br/>aeruginosa</i> PA7<br>(ABR82406), 2e-69 | Putative<br>alginate lyase-<br>like protein                                         |
| PFL_4741 | PFL_4741 | 5478387..5479724     | 445 | 48.058 | GAAG          | None detected | Putative<br>sodium/hydrogen<br>exchanger from<br><i>Pseudomonas<br/>fluorescens</i> Pf0-1<br>(ABA74434), 8e-160                       | Putative<br>sodium/<br>hydrogen<br>exchanger<br>family protein<br>(COG0025)         |
| PFL_4742 | PFL_4742 | 5480448..5481608     | 386 | 41.445 | GGAGGA        | None detected | Putative Zn-dependent<br>alcohol dehydrogenase<br>from <i>Pseudomonas<br/>stutzeri</i> A1501<br>(ABA74434), 8e-178                    | Putative<br>glutathione-<br>dependent<br>formaldehyde<br>dehydrogenase<br>(COG1063) |
| PFL_4743 | PFL_4743 | 5481629..5482561     | 310 | 35.571 | GGGA          | None detected | Hypothetical protein<br>PST_2148 from<br><i>Pseudomonas stutzeri</i><br>A1501 (ABP79813),<br>3e-111                                   | Conserved<br>hypothetical<br>protein<br>(COG1801)                                   |
| PFL_4744 | PFL_4744 | 5482558..5483334     | 258 | 29.208 | GAGG          | None detected | Hypothetical protein<br>PSPA7_3150 from<br><i>Pseudomonas<br/>aeruginosa</i> PA7<br>(ABR84096), 2e-94                                 | Putative metal-<br>dependent<br>hydrolase<br>(COG3568)                              |
| PFL_4745 | PFL_4745 | 5483331..5484524     | 397 | 44.786 | GGAGG         | None detected | Putative phospholipase<br>D/transphosphatidylase<br>from <i>Pseudomonas<br/>putida</i> W619<br>(ACA73138), 2e-144                     | Putative<br>phospholipase<br>family protein<br>(COG1502)                            |
| PFL_4746 | PFL_4746 | 5484934..5485197     | 87  | 9.849  | None detected | None detected | None detected                                                                                                                         | Hypothetical<br>protein                                                             |
| PFL_4747 | PFL_4747 | 5485205..5485960 (-) | 251 | 27.823 | GGTG          | None detected | Hypothetical protein                                                                                                                  | Putative prolyl                                                                     |



|                 |              |                      |                                                                       |        |       |                      |                                                                                                                                                                   |                                                                   |
|-----------------|--------------|----------------------|-----------------------------------------------------------------------|--------|-------|----------------------|-------------------------------------------------------------------------------------------------------------------------------------------------------------------|-------------------------------------------------------------------|
| PFL_4748        | PFL_4748     | 5485950..5487047 (-) | 365                                                                   | 40.345 | GGAGA | None detected        | PSPA7_3136 from <i>Pseudomonas aeruginosa</i> PA7 (ABR82328), 2e-108<br>Hypothetical protein PA2G_01253 from <i>Pseudomonas aeruginosa</i> 2192 (EAZ58036), 5e-91 | oligopeptidase (COG1506)<br>Conserved hypothetical protein        |
| PFL_4749        | PFL_4749     | 5487576..5487755     | 59                                                                    | 5.808  | GAGG  | None detected        | Putative general stress protein PST_3132 from <i>Pseudomonas stutzeri</i> A1501 (ABP80761), 4e-15                                                                 | Conserved hypothetical protein                                    |
| PFL_4750        | PFL_4750     | 5487797..5488909 (-) | 370                                                                   | 40.704 | GGAG  | None detected        | Putative sensor histidine kinase PP_3968 from <i>Pseudomonas putida</i> KT2440 (AE016590), 1e-101                                                                 | Putative sensor histidine kinase (COG0642)                        |
| 29 <sup>b</sup> | <i>orf29</i> | 5489044..5489640 (-) | 198                                                                   | 21.917 | GAGG  | None detected        | Putative DNA ligase D from <i>Pseudomonas putida</i> W619 (ACA73143), 7e-63                                                                                       | Putative ATP-dependent DNA ligase D                               |
| PFL_4751        | PFL_4751     | 5489951..5491837     | 628                                                                   | 68.892 | GGAG  | None detected        | Protein of unknown function DUF1528: relaxase from <i>Azotobacter vinelandii</i> AvOP (EAM03958), 0.0                                                             | Putative TraI-like conjugative relaxase                           |
| PFL_4752        | <i>int8</i>  | 5491834..5493171     | 445                                                                   | 50.922 | GAGG  | Multiple genome hits | Putative integrase PA2G_05424 from <i>Pseudomonas aeruginosa</i> 2192 (EAZ62001), 3e-124                                                                          | Putative integrase associated with mobile island PFGI-1 (COG4973) |
| PFL_4753        | <i>attR</i>  | 5493511..5493586 (-) | GGGTCGTTAGCTCAGTTGGTAGAGCAGTTGGCTTTTAAACCAATTGGTCGTAGGTTTCGAATCCCACAC |        |       |                      |                                                                                                                                                                   |                                                                   |

|            |      |                                                              |           |
|------------|------|--------------------------------------------------------------|-----------|
| (tRNA-Lys) |      |                                                              | GACCCACCA |
| Alignment  | attL | CTTTTAACCAATTGGTCGTAGGTTCGAATCCCACACGACCCACCA                |           |
| of attL    |      | :::::::::::::::::::::::::::::::::::::::::::::::::::::::::::: |           |
| and attR   | attR | CTTTTAACCAATTGGTCGTAGGTTCGAATCCCACACGACCCACCA                |           |

---

<sup>a</sup> Only expectation values of  $1e^{-05}$  and below were considered as significant matches during BLAST database searches; <sup>b</sup> open reading frame(s) not present in the original genome annotation; <sup>c</sup> open reading frame contains internal frameshifts; <sup>d</sup> open reading frame has an alternative start site.
