# Supplementary material for: Mobile genetic elements in the genome of the beneficial rhizobacterium Pseudomonas fluorescens Pf-5
Source: PubMed Central journal article supplement (PMC2647930; doi:10.1186/1471-2180-9-8), 2009-01-13
Supplement: 1471-2180-9-8-S10.pdf [file 1471-2180-9-8-S10.pdf]

**Additional file 10 – Sequence analysis of island 02 of *P. fluorescens* Pf-5**

| CDS                    | Gene name   | Position                                         | Protein length (residues) | Protein mol weight (kDa) | Putative ribosome binding site | Closest protein of phage or pyocin origin (accession no.), blastp E-value <sup>a</sup>                | Other similar proteins (accession no.), blastp E-value <sup>a</sup>                            | Predicted function (functional domains) |
|------------------------|-------------|--------------------------------------------------|---------------------------|--------------------------|--------------------------------|-------------------------------------------------------------------------------------------------------|------------------------------------------------------------------------------------------------|-----------------------------------------|
| PFL_4976<br>(tRNA-Leu) | <i>attL</i> | 5728474..5728491<br>(within tRNA-Ser – PFL_3739) |                           |                          |                                | GTCTCCCTCGGGGCACCA                                                                                    |                                                                                                |                                         |
| PFL_4977               | <i>int9</i> | 5728657..5729898                                 | 413                       | 46.144                   | GGAT                           | Site-specific recombinase from PAI-R1 island of <i>Pseudomonas viridiflava</i> ME3.1b (AAT96071), 0.0 | Putative site-specific recombinase from <i>Acinetobacter baumannii</i> AYE (CAM87726), 4e-80   | Putative phage integrase (COG0582)      |
| PFL_4978               | PFL_4978    | 5730145..5731083                                 | 312                       | 35.389                   | GGTG                           | None detected                                                                                         | Hypothetical protein PAI-R1-ORF15 from <i>Pseudomonas viridiflava</i> ME3.1b (AAT96072), 3e-61 | Conserved hypothetical protein          |
| 1 <sup>b</sup>         | <i>orf1</i> | 5731166..5731420                                 | 84                        | 9.114                    | GGTTAG                         | Prophage CP4-57 regulatory protein AlpA from <i>Azotobacter vinelandii</i> AvOP (EAM07670), 6e-12     | Avin4386-like protein from <i>Pseudomonas viridiflava</i> ME3.1b (AAT96073), 2e-22             | Putative phage regulatory protein       |
| 2 <sup>b</sup>         | <i>orf2</i> | 5731417..5731722                                 | 101                       | 11.589                   | GGTG                           | None detected                                                                                         | None detected                                                                                  | Hypothetical protein                    |
| 3 <sup>b</sup>         | <i>orf3</i> | 5731770..5732255                                 | 161                       | 17.348                   | GAGG                           | None detected                                                                                         | None detected                                                                                  | Hypothetical protein                    |
| 4 <sup>b</sup>         | <i>orf4</i> | 5732252..5732536                                 | 94                        | 10.009                   | GGTG                           | Hypothetical protein PAI-R1-ORF18 from <i>Pseudomonas viridiflava</i> ME3.1b (AAT96075), 2e-21        | None detected                                                                                  | Conserved hypothetical protein          |
| 5 <sup>b</sup>         | <i>orf5</i> | 5732533..5732802                                 | 89                        | 9.801                    | GGTG                           | Hypothetical protein                                                                                  | Hypothetical protein                                                                           | Conserved                               |

|                       |             |                      |     |         |       |                                                                                                                                                                                         |                                                                                                                                                                            |                                                                  |
|-----------------------|-------------|----------------------|-----|---------|-------|-----------------------------------------------------------------------------------------------------------------------------------------------------------------------------------------|----------------------------------------------------------------------------------------------------------------------------------------------------------------------------|------------------------------------------------------------------|
| PFL_4979 <sup>d</sup> | PFL_4979    | 5732799..5735693     | 964 | 104.699 | GAGG  | PAI-R1-ORF19 from <i>Pseudomonas viridiflava</i> ME3.1b (AAT96076), 4e-09<br>Putative inner membrane protein<br>PAI-R1-ORF20 from <i>Pseudomonas viridiflava</i> ME3.1b (AAT96077), 0.0 | PFL_1012 from <i>Pseudomonas fluorescens</i> Pf-5 (AAY90299), 2e-13<br>Hypothetical protein MADE_09538 from <i>Alteromonas macleodii</i> 'Deep ecotype' (EAR03332), 7e-170 | hypothetical protein<br>Conserved hypothetical protein (COG5519) |
| PFL_4980              | PFL_4980    | 5735782..5736762     | 326 | 37.070  | AGGA  | Hypothetical protein PAI-R1-ORF21 from <i>Pseudomonas viridiflava</i> ME3.1b (AAT96078), 3e-73                                                                                          | Hypothetical protein Psyr_0094 from <i>Pseudomonas syringae</i> pv. <i>syringae</i> B728a (AAY35168), 2e-52                                                                | Conserved hypothetical protein                                   |
| PFL_4981              | PFL_4981    | 5737081..5737446     | 121 | 13.823  | AGGA  | None detected                                                                                                                                                                           | Putative transcriptional H-NS regulator from <i>Pseudomonas</i> sp. Y1000 (CAD98777), 4e-48                                                                                | Putative transcriptional regulator/nucleoid-associated protein   |
| 6 <sup>b</sup>        | <i>orf6</i> | 5738003..5738776     | 257 | 29.754  | AGGA  | None detected                                                                                                                                                                           | Hypothetical protein MELB17_10963 from <i>Marinobacter</i> sp. ELB17 (EAZ97039), 2e-23                                                                                     | Conserved hypothetical protein                                   |
| 7 <sup>b</sup>        | <i>orf7</i> | 5739183..5739902 (-) | 239 | 27.510  | GAGAG | None detected                                                                                                                                                                           | None detected                                                                                                                                                              | Hypothetical protein                                             |
| PFL_4982 <sup>d</sup> | PFL_4982    | 5740075..5741337 (-) | 420 | 46.728  | GTTG  | None detected                                                                                                                                                                           | Hypothetical protein GlovDRAFT_1783 from <i>Geobacter lovleyi</i> SZ (EAV88171), 1e-43                                                                                     | Conserved hypothetical protein                                   |
| PFL_4983              | PFL_4983    | 5741341..5742471 (-) | 376 | 41.241  | GGAAG | None detected                                                                                                                                                                           | Conserved hypothetical protein from <i>Geobacter lovleyi</i> SZ (EAV88150), 1e-61                                                                                          | Putative nucleoid-associated bacterial protein (COG3081)         |
| PFL_4984              | PFL_4984    | 5743437..5745014 (-) | 525 | 60.166  | AGGA  | None detected                                                                                                                                                                           | Hypothetical protein Acid345_3761 from                                                                                                                                     | Putative nuclease of RecB family                                 |

*Acidobacteria* (COG1637)  
*bacterium* Ellin345  
(ABF42761), 4e-45

*attR* 5745229..5745246 GTCTCCCTCGGGGCACCA  
Alignment of attL GTCTCCCTCGGGGCACCA  
attL and attR: ::::::::::::::::::::  
attR GTCTCCCTCGGGGCACCA

---

<sup>a</sup> Only expectation values of  $1e^{-05}$  and below were considered as significant matches during BLAST database searches; <sup>b</sup> open reading frame(s) not present in the original genome annotation; <sup>c</sup> open reading frame contains internal frameshifts; <sup>d</sup> open reading frame has an alternative start site.
