# Supplementary material for: Mobile genetic elements in the genome of the beneficial rhizobacterium Pseudomonas fluorescens Pf-5
Source: BMC Microbiol. 2009 Jan 13;9:8. doi: 10.1186/1471-2180-9-8 (PMC2647930; doi:10.1186/1471-2180-9-8)
Supplement: Additional file 8 — Sequence analysis of prophage 05 of P. fluorescens Pf-5. Table containing annotation of mobile genetic element prophage 05 in the genome of Pseudomonas fluorescens Pf-5. The following information is provided for each open reading frame: locus tag number, gene name, genome coordinates, length and molecular weight of encoded protein, sequence of putative ribosome binding site, description of the closest GenBank match plus blast E-value, list of functional domains and predicted function. [file 1471-2180-9-8-S8.pdf]

### Additional file 8 – Sequence analysis of prophage 05 of *P. fluorescens* Pf-5

| CDS                                        | Gene name   | Position                                      | Protein length (residues)                                                                                                | Protein mol weight (kDa) | Putative ribosome binding site | Closest protein of phage or pyocin origin (accession no.), blastp E-value <sup>a</sup>                             | Other similar proteins (accession no.), blastP E-value <sup>a</sup>                                                           | Predicted function (functional domains)          |
|--------------------------------------------|-------------|-----------------------------------------------|--------------------------------------------------------------------------------------------------------------------------|--------------------------|--------------------------------|--------------------------------------------------------------------------------------------------------------------|-------------------------------------------------------------------------------------------------------------------------------|--------------------------------------------------|
|                                            | <i>attL</i> | 3979487..3979570                              | GCAATAAAAAACCCCGTAGACGTTAATCTACGGGGTTTTCAAGGGTGGAGGCCGAGGTTCGGAATCGAACCGG                                                |                          |                                |                                                                                                                    |                                                                                                                               |                                                  |
| PFL_3464 <sup>d</sup>                      | PFL_3464    | 3979525..3980079 (-)                          | 184                                                                                                                      | 20.973                   | GGTG                           | Host specificity protein J from <i>Shewanella oneidensis</i> MR-1 prophage LambdaSo (NP_718509); 3e <sup>-56</sup> | Putative phage tail component protein Paer2_01001065 from <i>Pseudomonas aeruginosa</i> 2192 (ZP_00975650); 2e <sup>-63</sup> | Phage tail protein J (COG4733)                   |
| 1 <sup>b</sup>                             | <i>orfI</i> | 3980099..3980626 (-)                          | 175                                                                                                                      | 18.426                   | GGAATG                         | None detected                                                                                                      | Putative flavoprotein HCH_01405 from <i>Hahella chejuensis</i> KCTC 2396 (ABC28268); 1e <sup>-35</sup>                        | Putative NADPH-dependent FMN reductase (COG0431) |
| 2 <sup>bc</sup>                            | <i>int</i>  | 3981099..3981948                              | 281                                                                                                                      | 32.077                   | GTGAG                          | Multiple prophage genome hits                                                                                      | Site-specific recombinase PSEEN2226 from <i>Pseudomonas entomophila</i> L48 (CAK15045); 5e <sup>-100</sup>                    | Putative inactive phage integrase                |
|                                            | <i>attR</i> | 3982003..3982086 (within tRNA-Cys – PFL_3456) | GCAATAAAAAACCCCGTAGACGTTAATCTACGGGGTTTTCAAGGGTGGAGGCCGAGGTTCGGAATCGAACCGG                                                |                          |                                |                                                                                                                    |                                                                                                                               |                                                  |
| Alignment of <i>attL</i> and <i>attR</i> : |             | attL                                          | GCAATAAAAAACCCCGTAGACGTTAATCTACGGGGTTTTCAAGGGTGGAGGCCGAGGTTCGGAATCGAACCGGCGTAGGCGGATT                                    |                          |                                |                                                                                                                    |                                                                                                                               |                                                  |
|                                            |             |                                               | :::::::::::::::::::::::::::::::::::::::::::::::::::::::::::::::::::::::::::::::::::::::::::::::::::::::::::::::::::::::: |                          |                                |                                                                                                                    |                                                                                                                               |                                                  |
|                                            |             | attR                                          | GCAATAAAAAACCCCGTAGACGTTAATCTACGGGGTTTTCAAGGGTGGAGGCCGAGGTTCGGAATCGAACCGGCGTAGGCGGATT                                    |                          |                                |                                                                                                                    |                                                                                                                               |                                                  |

<sup>a</sup> Only expectation values of 1e<sup>-05</sup> and below were considered as significant matches during BLAST database searches; <sup>b</sup> open

reading frame(s) not present in the original genome annotation; <sup>c</sup> open reading frame contains internal frameshifts; <sup>d</sup> open reading

frame has an alternative start site.
